# Supplementary material for: Transcriptome-wide Association Study of Blood Cell Traits in African Ancestry and Hispanic/Latino Populations
Source: Preprints.org preprint supplement (doi:10.20944/preprints202106.0129.v1), 2021-06-04
Supplement: Supplementary file 3 [file Supplementary_Tables_finalSUB.xlsx]

## Sheet: Supplementary Table 1
Supplementary Table 1 Summary of eQTL and GWAS datasets used for this study
	Sample size	Ethnic origin	Dataset	Genetic data used	Imputation reference panel
DGN	922	EA	eQTL	Illumina HumanOmni1-Quad BeadChip	TOPMed 5b
MESA	229	AA	eQTL	Whole genome sequencing data (TOPMed freeze 8)
MESA	381	HL	eQTL	Whole genome sequencing data (TOPMed freeze 8)
ARIC	2874	AA	GWAS	Affymetrix 6.0	TOPMed 5b
BioMe	3550	AA	GWAS	Illumina OmniExpress	TOPMed 5b
CARDIA	953	AA	GWAS	Affymetrix 6.0	TOPMed 5b
GERA	3699	AA	GWAS	Affymetrix Axiom5	TOPMed 5b
UK Biobank	8262	AA	GWAS	UK BiLEVE or Biobank18	TOPMed 5b
WHI	4730	AA	GWAS	MEGA and Affymetrix 6.0	TOPMed 5b
WHI	1386	AA	GWAS	MEGA	TOPMed 5b
WHI	2501	AA	GWAS	Affymetrix 6.0	TOPMed 5b
BioMe	4730	HL	GWAS	Illumina OmniExpress	TOPMed 5b
GERA	7348	HL	GWAS	Affymetrix Axiom	TOPMed 5b
WHI	3267	HL	GWAS	MEGA/Affymetrix 6.0	TOPMed 5b
HCHS/SOL	11887	HL	GWAS	Illumina Omni 2.5/MEGA	TOPMed 5b
WHI	1092	HL	GWAS	MEGA	TOPMed 5b

## Sheet: Supplementary Table 2
Supplementary Table 2 Comparison of training results between DGN and MESA reference panel
	Restrict to the common genes			Restrict to the common genes with model R2 > 0.05
Training models	Mean	Median	# genes	Training models	Mean	Median	# genes
DGN	0.238	0.169	4911	DGN	0.239	0.171	4853
MESA AA	0.287	0.256	4911	MESA AA	0.29	0.258	4853
DGN	0.239	0.173	5072	DGN	0.249	0.186	4631
MESA HL	0.205	0.161	5072	MESA HL	0.222	0.181	4631

## Sheet: Supplementary Table 3
Supplementary Table 3 Comparison of performance of prediction of true gene expression in GENOA using DGN and MESA AA reference panels
	Original DGN (N=922) and MESA AA			Subsampled DGN (N=229) and MESA AA			Cut-off of Model R2	Overlapping genes only?
Training Models	Median true R2	Mean true R2	# Genes	Median true R2	Mean true R2	# Genes
DGN	0.002	0.018	9383	0.002	0.014	11409	0	No
MESA AA	0.002	0.019	5688	0.002	0.019	5688	0	No
DGN	0.004	0.024	4043	0.003	0.019	4851	0	Yes
MESA AA	0.002	0.02	4043	0.002	0.019	4851	0	Yes
DGN	0.004	0.027	3426	0.003	0.022	4751	0.05	Yes
MESA AA	0.003	0.022	3426	0.002	0.019	4751	0.05	Yes

## Sheet: Supplementary Table 4
Supplementary Table 4 All the association results identified by marginal p.value < 1e-4. Conditional p-value is listed as "NA" if there are no nearby known GWAS variants. The order of the direction for each cohort is the same with cohorts listed in Supplementary Table 1.
Locus index	Gene	ENSGID	Chr	Start_hg38	End_hg38	Phenotype	Meta_beta	Meta_se	Direction	Marginal p value	Conditional p value	Model R2	# SNPs in training model	TWAS reference panel	Discovery population	Bonferroni threshold value	Bonferroni_sig	Regenie beta	Regenie p.value	Replicate_UKB_sig
1	APEH	ENSG00000164062	3	49674002	49683963	HCT	-0.0680664	0.0169719	(--------)	7.69e-05	NA	0.261	44	DGN	AA	5e-06	0	-0.02	1.7e-06	1
2	ZNF655	ENSG00000197343	7	99558406	99576453	HCT	0.136608	0.0325432	(++++++++)	2.47e-05	2.94e-05	0.114	58	DGN	AA	5e-06	0	0.01	0.0335	0
3	MOSPD3	ENSG00000106330	7	100612102	100615384	HCT	-0.0928939	0.0221099	(--+-----)	4.23e-05	0.048	0.297	27	DGN	AA	5e-06	0	-0.03	9.67e-34	1
4	ABO	ENSG00000175164	9	133250401	133275219	HCT	0.0585351	0.00985643	(++++++--)	3.34e-09	0.033	0.736	90	DGN	AA	5e-06	1	0.13	2.4e-128	1
5	ADAR	ENSG00000160710	1	154582062	154627999	HGB	-0.115787	0.0297131	(--------)	9.05e-05	0.000192	0.175	43	DGN	AA	5e-06	0	-0.01	9.35e-05	1
6	HIST1H4H	ENSG00000158406	6	26277609	26285638	HGB	0.132417	0.0302985	(-+++++++)	3.5e-05	0.00713	0.171	16	DGN	AA	5e-06	0	0.02	3.02e-12	1
2	ZNF655	ENSG00000197343	7	99558406	99576453	HGB	0.143482	0.0326214	(++++++-+)	9.08e-06	9.67e-06	0.114	58	DGN	AA	5e-06	0	0.02	0.00551	0
4	ABO	ENSG00000175164	9	133250401	133275219	HGB	0.0582372	0.00983924	(+++++++-)	3.9e-09	0.138	0.736	90	DGN	AA	5e-06	1
7	HBZ	ENSG00000130656	16	152687	154503	HGB	-0.0580806	0.0116457	(--+----+)	8.41e-07	0.0909	0.66	51	DGN	AA	5e-06	1
7	HBQ1	ENSG00000086506	16	180453	181181	HGB	-0.104914	0.0138569	(--------)	4.88e-14	0.214	0.254	41	DGN	AA	5e-06	1
7	RAB11FIP3	ENSG00000090565	16	425619	523011	HGB	0.221427	0.0543505	(+-++++++)	4.48e-05	0.217	0.078	15	DGN	AA	5e-06	0
7	WDR24	ENSG00000127580	16	684622	690444	HGB	-0.0802573	0.0189868	(+-------)	4e-05	0.0116	0.268	19	DGN	AA	5e-06	0	0.01	0.0746	0
8	ITPA	ENSG00000125877	20	3208868	3223870	HGB	0.0339022	0.0083922	(+-++++++)	9.9e-05	9.1e-05	0.582	55	DGN	AA	5e-06	0	0	0.607	0
9	LAMA5	ENSG00000130702	20	62307955	62367312	HGB	0.0429207	0.011062	(++++++++)	6.4e-05	0.00099	0.498	169	DGN	AA	5e-06	0	-0.01	0.28	0
10	PLOD1	ENSG00000083444	1	11934205	11975538	PLT	0.0535328	0.0127654	(++++++-+)	2.75e-05	0.292	0.614	38	DGN	AA	5e-06	0
10	MFN2	ENSG00000116688	1	11980181	12013514	PLT	0.044933	0.0103301	(++++++-+)	1.36e-05	0.181	0.84	34	DGN	AA	5e-06	0
11	LDLRAP1	ENSG00000157978	1	25543580	25568886	PLT	0.0411149	0.00962923	(-++++++-)	1.96e-05	0.902	0.694	25	DGN	AA	5e-06	0
12	EHD3	ENSG00000013016	2	31234337	31269447	PLT	-0.127823	0.029622	(--------)	1.6e-05	0.0502	0.188	42	DGN	AA	5e-06	0
13	BAZ2B	ENSG00000123636	2	159318979	159616692	PLT	0.0376	0.0089	(+-+++++-)	2.43e-05	0.000173	0.615	165	DGN	AA	5e-06	0	0.00908113	0.0732	0
14	BAK1	ENSG00000030110	6	33572547	33580293	PLT	-0.0772406	0.00818299	(--------)	3.76e-21	0.273	0.792	43	DGN	AA	5e-06	1
14	C6orf227	ENSG00000197251	6	33586106	33593338	PLT	0.326521	0.0465942	(++++++++)	2.42e-12	0.442	0.099	28	DGN	AA	5e-06	1
15	CD36	ENSG00000135218	7	80369575	80679277	PLT	-0.0652	0.0157	(--------)	3.09e-05	0.167	0.28	93	DGN	AA	5e-06	0
16	PLEC	ENSG00000178209	8	143915147	143976734	PLT	-0.0729385	0.0184308	(--+---+-)	7.58e-05	0.018	0.399	25	DGN	AA	5e-06	0	-0.06	2.61e-91	1
17	RIN1	ENSG00000174791	11	66330242	66336840	PLT	0.0344929	0.00742501	(++++++++)	3.39e-06	4.25e-06	0.651	45	DGN	AA	5e-06	1	0.02	5.56e-07	1
18	MEG3	ENSG00000214548	14	100779410	100861031	PLT	0.0891	0.0214	(++++++++)	3.15e-05	0.000335	0.28	25	DGN	AA	5e-06	0	0.0602506	1.46e-83	1
19	TPM4	ENSG00000167460	19	16067021	16103002	PLT	0.1001	0.0246	(+-+++++-)	4.83e-05	0.0669	0.157	46	DGN	AA	5e-06	0
20	TEKT2	ENSG00000092850	1	36084075	36088275	WBC	0.136789	0.0301993	(++++++-+)	5.66e-06	1.16e-05	0.085	11	DGN	AA	5e-06	0	0	0.824	0
21	DARS	ENSG00000115866	2	135906677	135986100	WBC	0.049404	0.00999355	(++++++++)	8.35e-07	0.00019	0.537	46	DGN	AA	5e-06	1	0.01	0.0619	0
22	ARAP2	ENSG00000047365	4	35948221	36244509	WBC	-0.095676	0.0169227	(--+-----)	1.65e-08	0.00249	0.211	101	DGN	AA	5e-06	1	-0.03	1.19e-05	1
23	PF4V1	ENSG00000109272	4	73853189	73854155	WBC	0.0455953	0.0109966	(++++++++)	4.09e-05	0.0014	0.64	64	DGN	AA	5e-06	0	0.01	0.00169	0
24	IL4	ENSG00000113520	5	132673986	132682676	WBC	-0.143064	0.0358703	(------+-)	8.56e-05	0.00023	0.091	20	DGN	AA	5e-06	0	-0.14	1.95e-07	1
25	SLC17A5	ENSG00000119899	6	73593379	73654155	WBC	-0.0963331	0.0241498	(--+-----)	6.81e-05	NA	0.132	98	DGN	AA	5e-06	0	-0.1	0.0058	0
26	JAZF1	ENSG00000153814	7	27830573	28180743	WBC	-0.0819499	0.0202422	(---+----)	4.25e-05	0.751	0.284	58	DGN	AA	5e-06	0
26	CREB5	ENSG00000146592	7	28299321	28825894	WBC	-0.0755918	0.0121209	(--------)	5.35e-10	0.21	0.418	20	DGN	AA	5e-06	1
27	ABCA13	ENSG00000179869	7	48171458	48647496	WBC	0.380747	0.0873505	(+-++++++)	1.3e-05	1.29e-05	0.059	17	DGN	AA	5e-06	0	0.01	0.0126	0
28	PSMB7	ENSG00000136930	9	124353466	124415444	WBC	-0.106964	0.0238055	(--+-----)	7.17e-06	1.04e-05	0.176	73	DGN	AA	5e-06	0	-0.03	0.00117	0
29	ODF2	ENSG00000136811	9	128455186	128501292	WBC	0.158345	0.0377206	(-+++++++)	2.56e-05	3.95e-05	0.062	10	DGN	AA	5e-06	0	0	0.613	0
30	FAS	ENSG00000026103	10	88990582	89015785	WBC	0.0509225	0.0132584	(++-+++++)	9.1e-05	8.34e-05	0.401	52	DGN	AA	5e-06	0	0.01	0.000171	1
31	RPS13	ENSG00000110700	11	17074389	17077787	WBC	0.0746238	0.0185182	(+++-+-++)	5.07e-05	NA	0.2	95	DGN	AA	5e-06	0	-0.01	0.252	0
32	PSMD3	ENSG00000108344	17	39980797	39997960	WBC	0.103115	0.020546	(++-+++++)	5.12e-07	0.429	0.18	86	DGN	AA	5e-06	1
32	MED24	ENSG00000008838	17	40019097	40061215	WBC	-0.0779739	0.0144489	(--+-----)	7.86e-08	0.531	0.287	59	DGN	AA	5e-06	1
33	TTC39C	ENSG00000168234	18	23992773	24135610	WBC	0.0530782	0.0124689	(++++++++)	2.27e-05	0.971	0.309	86	DGN	AA	5e-06	0
34	ENG	ILMN_1760778.ENSG00000106991	9	127815012	127854756	HCT	-0.070913	0.0145365	(--------)	1.24e-06	0.00265	0.428	22	MESA	AA	7.2e-06	1	-0.05	9.31e-27	1
35	SMAGP	ILMN_2380243.ENSG00000170545	12	51244558	51270890	HCT	-0.06345	0.0151874	(-+------)	2.79e-05	7.98e-05	0.441	29	MESA	AA	7.2e-06	0	-0.0033	0.47	0
34	ENG	ILMN_1760778.ENSG00000106991	9	127815012	127854756	HGB	-0.0633561	0.014506	(-+------)	1.27e-05	0.00344	0.428	22	MESA	AA	7.2e-06	0	-0.05	3.83e-24	1
36	NPRL3	ILMN_2369580.ENSG00000103148	16	84271	138860	HGB	0.268373	0.0399057	(+-++++++)	1.34e-11	0.257	0.205	14	MESA	AA	7.2e-06	1
36	FAM234A	ILMN_1810055.ENSG00000167930	16	234546	268971	HGB	0.197233	0.040858	(++++++++)	1.33e-06	0.0868	0.308	22	MESA	AA	7.2e-06	1
36	RAB11FIP3	ILMN_1708328.ENSG00000090565	16	425619	523011	HGB	0.191007	0.0458398	(+-++++++)	2.45e-05	0.527	0.244	22	MESA	AA	7.2e-06	0
36	ANTKMT	ILMN_1773780.ENSG00000103254	16	720581	722601	HGB	-0.111623	0.0273337	(-+------)	5.79e-05	0.2	0.371	30	MESA	AA	7.2e-06	0
36	CIAO3	ILMN_1813833.ENSG00000103245	16	729753	741329	HGB	-0.241064	0.0446025	(-+------)	3.46e-08	0.829	0.28	20	MESA	AA	7.2e-06	1
13	BAZ2B	ILMN_1720850.ENSG00000123636	2	159318979	159616692	PLT	0.217507	0.0496791	(+-++++++)	1.34e-05	3.98e-05	0.154	13	MESA	AA	7.2e-06	0	0.0170286	8.84e-07	1
14	BAK1	ILMN_1805990.ENSG00000030110	6	33572547	33580293	PLT	-0.212445	0.0267462	(--------)	2.3e-15	0.524	0.229	13	MESA	AA	7.2e-06	1
15	CD36	ILMN_1784863.ENSG00000135218	7	80369575	80679277	PLT	0.0780561	0.0152158	(--++++++)	6.55e-07	6.98e-06	0.64	100	MESA	AA	7.2e-06	1	-0.04	2.33e-17	0
37	NRBF2	ILMN_3237385.ENSG00000148572	10	63133247	63155031	PLT	-0.130715	0.0154748	(--------)	3.53e-17	0.094	0.351	42	MESA	AA	7.2e-06	1
38	CCDC186	ILMN_1734010.ENSG00000165813	10	114120862	114174220	PLT	-0.311931	0.0787738	(--------)	7.22e-05	NA	0.096	3	MESA	AA	7.2e-06	0	-0.000818	0.772	0
39	ST3GAL5	ILMN_1713496.ENSG00000115525	2	85837120	85905199	WBC	-0.0751137	0.018428	(-+------)	4.26e-05	NA	0.519	86	MESA	AA	7.2e-06	0	-0.016932	0.0106	0
21	RAB3GAP1	ILMN_1739876.ENSG00000115839	2	135052265	135176394	WBC	-0.182745	0.0427444	(--------)	2.38e-05	0.0001	0.212	23	MESA	AA	7.2e-06	0	-0.0090922	0.297	0
21	DARS	ILMN_1813836.ENSG00000115866	2	135906677	135986100	WBC	0.14241	0.0234731	(++++++++)	1.37e-09	3.83e-05	0.206	12	MESA	AA	7.2e-06	1	0.00843965	0.033	0
40	BCS1L	ILMN_1738529.ENSG00000074582	2	218658764	218663443	WBC	0.0914515	0.0225674	(++++++++)	5.54e-05	0.000157	0.257	14	MESA	AA	7.2e-06	0	-0.0248466	0.000443	0
22	ARAP2	ILMN_1767541.ENSG00000047365	4	35948221	36244509	WBC	-0.0690203	0.0170583	(------++)	4.23e-05	0.29	0.512	64	MESA	AA	7.2e-06	0
22	ARAP2	ILMN_3244434.ENSG00000047365	4	35948221	36244509	WBC	-0.0758925	0.0174778	(--+-----)	1.25e-05	0.347	0.479	69	MESA	AA	7.2e-06	0
26	JAZF1	ILMN_1682727.ENSG00000153814	7	27830573	28180743	WBC	-0.070296	0.0138096	(--------)	2.76e-07	0.891	0.492	19	MESA	AA	7.2e-06	1
15	CD36	ILMN_1784863.ENSG00000135218	7	80369575	80679277	WBC	0.0658724	0.0143097	(++++++++)	3.69e-06	NA	0.64	100	MESA	AA	7.2e-06	1	0.00528109	0.356	0
41	PSMD3	ILMN_1796430.ENSG00000108344	17	39980797	39997960	WBC	-0.13172	0.0327495	(-+-+----)	6.28e-05	0.00896	0.159	15	MESA	AA	7.2e-06	0	0.18	3e-293	0
33	TTC39C	ILMN_1746720.ENSG00000168234	18	23992773	24135610	WBC	0.0542002	0.0115716	(++++++++)	3.28e-06	0.604	0.556	31	MESA	AA	7.2e-06	1
42	EFNA3	ENSG00000143590	1	155078872	155087538	HCT	-0.120735	0.0297378	(----+)	4.49e-05	0.368	0.098	18	DGN	HL	5e-06	0
42	TRIM46	ENSG00000163462	1	155173787	155184971	HCT	-0.178099	0.0425059	(----+)	2.74e-05	0.868	0.074	26	DGN	HL	5e-06	0
42	THBS3	ENSG00000169231	1	155195588	155209051	HCT	0.0540344	0.0100838	(+++++)	9.8e-08	0.79	0.598	53	DGN	HL	5e-06	1
42	GBAP1	ENSG00000169231	1	155213821	155227422	HCT	-0.0404202	0.00952631	(-----)	2.23e-05	0.245	0.632	33	DGN	HL	5e-06	0
43	TMEM120A	ENSG00000189077	7	75986837	75994659	HCT	0.0995363	0.0255138	(-++++)	8.91e-05	NA	0.165	61	DGN	HL	5e-06	0	-0.01	0.0762	0
4	ABO	ENSG00000175164	9	133250401	133275219	HCT	0.0432396	0.0104589	(+++++)	4.29e-05	0.14	0.736	90	DGN	HL	5e-06	0
42	THBS3	ENSG00000169231	1	155195588	155209051	HGB	0.0411503	0.0100803	(++++-)	2.68e-05	0.784	0.598	53	DGN	HL	5e-06	0
43	TMEM120A	ENSG00000189077	7	75986837	75994659	HGB	0.108533	0.025499	(-++++)	6.81e-05	NA	0.165	61	DGN	HL	5e-06	0	-0.01	0.0824	0
4	ABO	ENSG00000175164	9	133250401	133275219	HGB	0.059963	0.0104557	(+++++)	1.35e-08	0.892	0.736	90	DGN	HL	5e-06	1
44	CCDC15	ENSG00000149548	11	124954121	125041489	HGB	0.0598625	0.0163062	(++++-)	8.18e-05	NA	0.236	132	DGN	HL	5e-06	0	0.06	0.101	0
45	SERINC4	ENSG00000184716	15	43794162	43800221	HGB	-0.0980091	0.0259403	(+---+)	6.77e-05	0.00176	0.097	33	DGN	HL	5e-06	0	-0.03	4.33e-06	1
11	LDLRAP1	ENSG00000157978	1	25543580	25568886	PLT	0.0342494	0.00853643	(+++++)	6.55e-05	0.226	0.694	25	DGN	HL	5e-06	0
46	ZDHHC18	ENSG00000204160	1	26826710	26857602	PLT	0.0616347	0.0152718	(+++++)	7.24e-05	0.0013	0.387	49	DGN	HL	5e-06	0	0.02	8.98e-13	1
47	SPTA1	ENSG00000163554	1	158610706	158686715	PLT	0.302143	0.062251	(+++++)	8.37e-07	NA	0.067	34	DGN	HL	5e-06	1	0	0.854	0
48	FCRL6	ENSG00000181036	1	159800511	159816251	PLT	0.222267	0.0560267	(+++++)	7.26e-05	NA	0.074	31	DGN	HL	5e-06	0		NA	NA
14	BAK1	ENSG00000030110	6	33572547	33580293	PLT	-0.0411682	0.00778416	(-----)	1.96e-07	0.305	0.792	43	DGN	HL	5e-06	1
49	TRAM2	ENSG00000065308	6	52497402	52576915	PLT	-0.07988	0.0184564	(-----)	1.59e-05	0.000195	0.279	64	DGN	HL	5e-06	0	-0.04	1.57e-10	1
50	CLN3	ENSG00000188603	16	28474111	28495575	PLT	-0.0912222	0.0222379	(+----)	5.98e-05	0.00111	0.161	40	DGN	HL	5e-06	0	-0.07	3.42e-87	1
32	MED24	ENSG00000008838	17	40019097	40061215	PLT	-0.0628831	0.0154417	(-+--+)	4.01e-05	NA	0.287	59	DGN	HL	5e-06	0	-0.01	0.00261	0
51	BTBD17	ENSG00000204347	17	74356416	74361946	PLT	0.0622262	0.0149941	(+++++)	3.68e-05	0.00369	0.316	62	DGN	HL	5e-06	0	0.01	0.0591	0
52	GRK7	ENSG00000114124	3	141778148	141818490	WBC	0.143486	0.0356688	(+++++)	7.54e-05	9.11e-05	0.095	26	DGN	HL	5e-06	0	0	0.649	0
53	LRPAP1	ENSG00000163956	4	3506376	3532559	WBC	-0.0542369	0.0138618	(-----)	9.27e-05	0.000185	0.382	55	DGN	HL	5e-06	0	-0.01	0.177	0
14	BAK1	ENSG00000030110	6	33572547	33580293	WBC	-0.0340607	0.00764539	(----+)	9.99e-06	1.53e-05	0.792	43	DGN	HL	5e-06	0	0.01	0.0983	0
54	LTBP3	ENSG00000168056	11	65538805	65558930	WBC	-0.0476788	0.0116447	(-----)	4.73e-05	6.17e-05	0.471	44	DGN	HL	5e-06	0	-0.01	0.00143	0
55	CD27	ENSG00000139193	12	6444867	6451718	WBC	0.0771266	0.0196589	(+++++)	8.72e-05	2.42e-05	0.255	65	DGN	HL	5e-06	0	0	0.713	0
56	PLD2	ENSG00000129219	17	4807096	4823434	WBC	0.0422749	0.0102001	(+++++)	3.2e-05	3.51e-05	0.66	172	DGN	HL	5e-06	0	0.02	1.01e-05	1
32	MED24	ENSG00000008838	17	40019097	40061215	WBC	-0.0742254	0.0151698	(-----)	9.99e-07	0.697	0.287	59	DGN	HL	5e-06	1
42	ADAM15	ILMN_1751500.ENSG00000143537	1	155050566	155062775	HCT	-0.0783585	0.0175971	(----+)	8.74e-06	0.252	0.301	31	MESA	HL	7.7e-06	0
42	THBS3	ILMN_1804663.ENSG00000169231	1	155195588	155209051	HCT	0.211523	0.0387472	(+++++)	5.4e-08	0.922	0.1	5	MESA	HL	7.7e-06	1
57	GTF2IRD2B	ILMN_2180997.ENSG00000174428	7	75092573	75149817	HCT	-0.24914	0.0559892	(-----)	9.18e-06	NA	0.138	16	MESA	HL	7.7e-06	0	0.00763049	0.197	0
58	AGAP6	ILMN_3239130.ENSG00000204149	10	49982190	50010499	HCT	-0.231369	0.0586637	(-----)	8.44e-05	NA	0.119	15	MESA	HL	7.7e-06	0	0.00528109	0.0408	0
59	SMAD6	ILMN_1767068.ENSG00000137834	15	66702228	66782849	HCT	-0.356171	0.08052	(----+)	1.14e-05	8.55e-06	0.074	7	MESA	HL	7.7e-06	0	-0.03	6.49e-11	1
42	ADAM15	ILMN_1751500.ENSG00000143537	1	155050566	155062775	HGB	-0.0660327	0.0175956	(----+)	3.95e-05	0.151	0.301	31	MESA	HL	7.7e-06	0
42	THBS3	ILMN_1804663.ENSG00000169231	1	155195588	155209051	HGB	0.158659	0.0387525	(++++-)	2.88e-05	0.771	0.1	5	MESA	HL	7.7e-06	0
60	ARHGAP19	ILMN_1688953.ENSG00000213390	10	97222173	97292673	HGB	-0.214868	0.0563182	(----+)	7.15e-05	NA	0.1	13	MESA	HL	7.7e-06	0	0.00438744	0.258	0
44	CCDC15	ILMN_1783676.ENSG00000149548	11	124954121	125041489	HGB	0.0586093	0.0161165	(++++-)	5.84e-05	NA	0.342	33	MESA	HL	7.7e-06	0	0.0091412	0.0333	0
59	SMAD6	ILMN_1767068.ENSG00000137834	15	66702228	6678284	HGB	-0.343731	0.0804893	(----+)	9.08e-06	4.77e-05	0.074	7	MESA	HL	7.7e-06	0	-0.03	2.44e-11	1
61	IL6R	ILMN_1696394.ENSG00000160712	1	154405193	154469450	PLT	-0.2317	0.0580101	(----+)	6.06e-05	0.763	0.065	5	MESA	HL	7.7e-06	0
14	BAK1	ILMN_1805990.ENSG00000030110	6	33572547	33580293	PLT	-0.117794	0.0285092	(---+-)	4.95e-05	0.242	0.167	17	MESA	HL	7.7e-06	0
62	PAQR8	ILMN_1694589.ENSG00000170915	6	52361421	52407777	PLT	0.0799407	0.0194408	(+++++)	4.79e-05	0.00127	0.268	29	MESA	HL	7.7e-06	0	0.025	6.25e-08	1
63	TNFAIP2	ILMN_1727689.ENSG00000185215	14	103123442	103137439	PLT	-0.265096	0.0649941	(-----)	6.85e-05	0.0081	0.095	16	MESA	HL	7.7e-06	0	-0.053	2.9e-30	1
64	SLC22A4	ILMN_2050911.ENSG00000197208	5	132294394	132344190	WBC	0.117439	0.0273829	(+++++)	1.73e-05	0.153	0.172	16	MESA	HL	7.7e-06	0
14	BAK1	ILMN_1805990.ENSG00000030110	6	33572547	33580293	WBC	-0.110385	0.0280008	(----+)	9.47e-05	0.000146	0.167	17	MESA	HL	7.7e-06	0	0.013	8.35e-05	0
65	GRINA	ILMN_1796490.ENSG00000178719	8	143990056	143993415	WBC	-0.298212	0.0769443	(--+--)	9.7e-05	NA	0.066	12	MESA	HL	7.7e-06	0	-0.004	0.0912	0
66	ATXN2	ILMN_1743829.ENSG00000204842	12	111443485	111599676	WBC	-0.337757	0.0707853	(--+-+)	1.56e-06	0.00212	0.079	10	MESA	HL	7.7e-06	1	-0.04	3.96e-10	1

## Sheet: Supplementary Table 5
Supplementary Table 5 All the known GWAS variants used for conditional analysis
Margnially significant genes that performed conditional analysis										GWAS known variants
Conditional analysis step	Gene	ENSGID	Chr	Start_hg38	End_hg38	Phenotype	Conditional p value	TWAS reference panel	Discovery population	SNP	PMID	Ancestry	Trait	Chr	Pos_b37	pos_b38	Locus	EffectAllele	OtherAllele	EAF	Beta	SE	P-value
Step 1	ZNF655	ENSG00000197343	7	99558406	99576453	HCT	2.94e-05	DGN	AA	rs546810441	27863252	European	HCT	7	100083971	100486348	NYAP1	A	G	0.0079	-0.288204	0.0226716	5.06e-37
Step 1	MOSPD3	ENSG00000106330	7	100612102	100615384	HCT	0.048	DGN	AA	rs10953299	29403010	Japanese	HCT	7	100243411	100645788	ACTL6B	C	T	0.198	0.039	0.006	1.12e-10
Step 1	MOSPD3	ENSG00000106330	7	100612102	100615384	HCT	0.048	DGN	AA	rs149823406	27863252	European	HCT	7	100314474	100716851	EPO	T	C	0.0103	-0.131423	0.0189823	4.41e-12
Step 1	MOSPD3	ENSG00000106330	7	100612102	100615384	HCT	0.048	DGN	AA	rs546810441	27863252	European	HCT	7	100083971	100486348	NYAP1	A	G	0.0079	-0.288204	0.0226716	5.06e-37
Step 1	MOSPD3	ENSG00000106330	7	100612102	100615384	HCT	0.048	DGN	AA	rs551238	27863252	European	HCT	7	100321528	100723905	EPO	T	G	0.5984	-0.0427105	0.00361683	3.51e-32
Step 1	MOSPD3	ENSG00000106330	7	100612102	100615384	HCT	0.048	DGN	AA	rs62482253	27863252	European	HCT	7	100275444	100677821	GNB2	A	G	0.0068	-0.197468	0.0250377	3.1e-15
Step 1	MOSPD3	ENSG00000106330	7	100612102	100615384	HCT	0.048	DGN	AA	rs7385804	19862010	European	HCT	7	100235970	100638347	TFR2	C	A	0.377358	-0.151	0.0242	4.45e-10
Step 1	ABO	ENSG00000175164	9	133250401	133275219	HCT	0.033	DGN	AA	rs10901252	27863252	European	HCT	9	136128000	133252613	RP11-430N14.4;ABO	C	G	0.0645	0.0564596	0.00726899	8.02e-15
Step 1	ABO	ENSG00000175164	9	133250401	133275219	HCT	0.033	DGN	AA	rs2519796	27863252	European	HCT	9	136825333	133960211	VAV2	A	G	0.6667	-0.0240844	0.00379288	2.15e-10
Step 1	ABO	ENSG00000175164	9	133250401	133275219	HCT	0.033	DGN	AA	rs495828	20139978	Japanese	HCT	9	136154867	133279294	ABP	T	G	0.28	-0.081	0.013	6.06e-10
Step 1	ADAR	ENSG00000160710.15	1	154582062	154627999	HGB	0.000192	DGN	AA	rs116100695	28787443	European	HGB	1	155261709	155291918	PKLR	G	A	0.9972	0.1832	0.0285	1.33e-10
Step 1	ADAR	ENSG00000160710.15	1	154582062	154627999	HGB	0.000192	DGN	AA	rs760077	27863252	European	HGB	1	155178782	155208991	MTX1	T	A	0.6031	0.0321882	0.00361907	5.89e-19
Step 1	HIST1H4H	ENSG00000158406.4	6	26277609	26285638	HGB	0.00713	DGN	AA	rs129128	19820698	European&Indian	HGB	6	26125342	26125114	HFE	C	T	NA	NA	NA	3.34e-08
Step 1	HIST1H4H	ENSG00000158406.4	6	26277609	26285638	HGB	0.00713	DGN	AA	rs144861591	27863252	European	HGB	6	26072992	26072764	NA	T	C	0.0771	0.180988	0.00665857	1.08e-162
Step 1	HIST1H4H	ENSG00000158406.4	6	26277609	26285638	HGB	0.00713	DGN	AA	rs1799945	19820698	European&Indian	HGB	6	26091179	26090951	HFE	G	C	NA	NA	NA	4.34e-08
Step 1	HIST1H4H	ENSG00000158406.4	6	26277609	26285638	HGB	0.00713	DGN	AA	rs1799945	27863252	European	HGB	6	26091179	26090951	HFE	G	C	0.1505	0.106743	0.004943	2.01e-103
Step 1	HIST1H4H	ENSG00000158406.4	6	26277609	26285638	HGB	0.00713	DGN	AA	rs1800562	19862010	European	HGB	6	26093141	26092913	HFE	A	G	0.041667	0.1617	0.0182	5.74e-19
Step 1	HIST1H4H	ENSG00000158406.4	6	26277609	26285638	HGB	0.00713	DGN	AA	rs198833	19820698	European&Indian	HGB	6	26114508	26114280	HFE	G	A	NA	NA	NA	1.36e-08
Step 1	HIST1H4H	ENSG00000158406.4	6	26277609	26285638	HGB	0.00713	DGN	AA	rs198846	19820698	European&Indian	HGB	6	26107463	26107235	HFE	G	A	NA	NA	NA	1.19e-08
Step 1	HIST1H4H	ENSG00000158406.4	6	26277609	26285638	HGB	0.00713	DGN	AA	rs198846	23222517	Europeans	HGB	6	26107463	26107235	HFE	NA	NA	NA	NA	NA	1.4e-30
Step 1	HIST1H4H	ENSG00000158406.4	6	26277609	26285638	HGB	0.00713	DGN	AA	rs198851	19820698	European&Indian	HGB	6	26104632	26104404	HFE	G	T	NA	NA	NA	3.5e-08
Step 1	HIST1H4H	ENSG00000158406.4	6	26277609	26285638	HGB	0.00713	DGN	AA	rs2032451	28453575	Hispanic	HGB	6	26092170	26091942	HFE	G	T	0.88	-0.12	0.02	3.1e-08
Step 1	ZNF655	ENSG00000197343.10	7	99558406	99576453	HGB	9.67e-06	DGN	AA	rs546810441	27863252	European	HGB	7	100083971	100486348	NYAP1	A	G	0.0079	-0.284841	0.0227785	7.03e-36
Step 1	WDR24	ENSG00000127580.15	16	684622	690444	HGB	0.0116	DGN	AA	rs11863726	23103231	AfricanAmerican	HGB	16	230578	180579	HBQ1	G	A	0.2711	-0.1298	0.02	8.9e-11
Step 1	WDR24	ENSG00000127580.15	16	684622	690444	HGB	0.0116	DGN	AA	rs13335497	23103231	AfricanAmerican	HGB	16	310005	260006	ITFG3	A	G	0.0685	-0.3435	0.036	1.8e-21
Step 1	WDR24	ENSG00000127580.15	16	684622	690444	HGB	0.0116	DGN	AA	rs13335629	23446634	AfricanAmerican	HGB	16	310380	260381	ITFG3;LUCL7;NPRL3;POLR3K;RPL2B;MPG	A	G	0.12	-0.19	0.019	2.63e-23
Step 1	WDR24	ENSG00000127580.15	16	684622	690444	HGB	0.0116	DGN	AA	rs2562181	28017375	AfricanAmerican	HGB	16	141659	91661	NPRL3;MPG	T	C	0.32	-0.0981	0.013	5.05e-14
Step 1	WDR24	ENSG00000127580.15	16	684622	690444	HGB	0.0116	DGN	AA	rs530159671	27863252	European	HGB	16	250184	200185	LUC7L	A	G	0.0021	-0.307091	0.0491872	4.28e-10
Step 1	WDR24	ENSG00000127580.15	16	684622	690444	HGB	0.0116	DGN	AA	rs7203560	23263863	AfricanAmerican	HGB	16	184390	134391	16p13.3	G	T	0.06081	-0.199	0.03555	2.23e-08
Step 1	WDR24	ENSG00000127580.15	16	684622	690444	HGB	0.0116	DGN	AA	rs8055546	27863252	European	HGB	16	249022	199023	LUC7L	T	C	0.0678	0.0484027	0.00705666	6.93e-12
Step 1	WDR24	ENSG00000127580.15	16	684622	690444	HGB	0.0116	DGN	AA	rs9924561	23103231	AfricanAmerican	HGB	16	314780	264781	ITFG3	G	T	0.066	-0.3885	0.038	6.6e-24
Step 2	ITPA	ENSG00000125877.12	20	3208868	3223870	HGB	9.1e-05	DGN	AA	rs78839561	32888494	European	HGB	20	4142839	4162192	SMOX	A	G	0.403289	0.0135037	0.00220605	9.2866e-10
Step 2	ITPA	ENSG00000125877.12	20	3208868	3223870	HGB	9.1e-05	DGN	AA	rs78839561	32888493	European	HGB	20	4142839	4162192	SMOX	A	G	0.398	0.012929	0.001928	2.09e-11
Step 2	LAMA5	ENSG00000130702.15	20	62307955	62367312	HGB	0.00099	DGN	AA	rs2379120	32888494	European	HGB	20	61030580	62455524		T	A	0.71043	-0.0178572	0.00238092	6.38e-14
Step 2	LAMA5	ENSG00000130702.15	20	62307955	62367312	HGB	0.00099	DGN	AA	rs4925184	32888494	European	HGB	20	61037490	62462434	GATA5	A	G	0.927916	0.0334781	0.00415373	7.64e-16
Step 2	LAMA5	ENSG00000130702.15	20	62307955	62367312	HGB	0.00099	DGN	AA	rs4925184	32888493	European	HGB	20	61037490	62462434	GATA5	A	G	0.928	0.032411	0.003784	1.13e-17
Step 1	PLEC	ENSG00000178209.14	8	143915147	143976734	PLT	0.018	DGN	AA	rs11136343	27346686	CombinedAncestry	PLT	8	145058986	143984818	PARP10/LOC105375801	G	A	0.402755	0.0381199	NA	8.46e-18
Step 1	PLEC	ENSG00000178209.14	8	143915147	143976734	PLT	0.018	DGN	AA	rs7833924	27863252	European	PLT	8	144996029	143921861	PLEC	G	A	0.4283	0.044989	0.003157	7.45e-33
Step 1	RIN1	ENSG00000174791.10	11	66330242	66336840	PLT	4.25e-06	DGN	AA	rs2448490	27863252	European	PLT	11	65412035	65644564	SIPA1	A	G	0.3643	-0.02665	0.0032669	4.96e-14
Step 1	TEKT2	ENSG00000092850.11	1	36084075	36088275	WBC	1.16e-05	DGN	AA	rs3917914	27863252	European	WBC#	1	36947888	36482287	CSF3R	A	G	0.0115	0.139348	0.0169292	1.85e-16
Step 1	TEKT2	ENSG00000092850.11	1	36084075	36088275	WBC	1.16e-05	DGN	AA	rs3917932	27863252	European	WBC#	1	36943916	36478315	CSF3R	G	C	0.5759	-0.0422066	0.00363179	3.21e-31
Step 1	TEKT2	ENSG00000092850.11	1	36084075	36088275	WBC	1.16e-05	DGN	AA	rs3917932	29403010	Japanese	WBC#	1	36943916	36478315	CSF3R	G	C	0.576	-0.037	0.004	5.09e-17
Step 1	DARS	ENSG00000115866.10	2	135906677	135986100	WBC	0.00019	DGN	AA	rs35837297	26805783	AfricanAmerican	WBC#	2	136594439	135836869	LCT	C	T	0.0245793	0.19478	0.02968	1.54e-08
Step 1	DARS	ENSG00000115866.10	2	135906677	135986100	WBC	0.00019	DGN	AA	rs35837297	26805783	EA+AA	WBC#	2	136594439	135836869	LCT	C	T	0.00337948	0.199268	0.033411	2.46e-09
Step 1	DARS	ENSG00000115866.10	2	135906677	135986100	WBC	0.00019	DGN	AA	rs35940156	26805783	AfricanAmerican	WBC#	2	136575300	135817730	LCT	T	C	0.0243111	0.18915	0.02998	4.27e-08
Step 1	DARS	ENSG00000115866.10	2	135906677	135986100	WBC	0.00019	DGN	AA	rs35940156	26805783	EA+AA	WBC#	2	136575300	135817730	LCT	T	C	0.0035455	0.19869	0.0338196	4.23e-09
Step 1	DARS	ENSG00000115866.10	2	135906677	135986100	WBC	0.00019	DGN	AA	rs75874749	29403010	Japanese	WBC#	2	136713108	135955538	DARS	C	T	0.153	0.067	0.006	6.75e-30
Step 1	DARS	ENSG00000115866.10	2	135906677	135986100	WBC	0.00019	DGN	AA	rs76927619	26805783	EA+AA	WBC#	2	135878409	135120839	RAB3GAP1	T	G	0.00303661	0.193308	0.036532	1.21e-07
Step 2	ARAP2	ENSG00000047365.11	4	35948221	36244509	WBC	0.00249	DGN	AA	rs28530750	32888494	European	WBC#	4	36312542	36310920	DTHD1	A	G	0.043417	0.0579448	0.00529266	6.78e-28
Step 2	ARAP2	ENSG00000047365.11	4	35948221	36244509	WBC	0.00249	DGN	AA	rs28530750	32888493	European	WBC#	4	36312542	36310920	DTHD1	A	G	0.043	0.055643	0.004613	1.83e-33
Step 1	PF4V1	ENSG00000109272.3	4	73853189	73854155	WBC	0.0014	DGN	AA	rs11725704	27863252	European	WBC#	4	74959996	74094279	CXCL2	G	A	0.3765	0.0660905	0.00370004	2.33e-71
Step 1	PF4V1	ENSG00000109272.3	4	73853189	73854155	WBC	0.0014	DGN	AA	rs1371799	25096241	AfricanAmerican	WBC#	4	74977837	74112120	CXCL2	C	T	0.761	0.023	0.0041	0.000521
Step 1	PF4V1	ENSG00000109272.3	4	73853189	73854155	WBC	0.0014	DGN	AA	rs1371799	25096241	EA	WBC#	4	74977837	74112120	CXCL2	C	T	0.572	0.012	0.003	2.14e-05
Step 1	PF4V1	ENSG00000109272.3	4	73853189	73854155	WBC	0.0014	DGN	AA	rs1371799	25096241	Japanese	WBC#	4	74977837	74112120	CXCL2	C	T	0.461	0.012	0.003	3.63e-05
Step 1	PF4V1	ENSG00000109272.3	4	73853189	73854155	WBC	0.0014	DGN	AA	rs16850073	27863252	European	WBC#	4	74703999	73838282	CXCL6	T	C	0.375	0.0453424	0.00371874	3.39e-34
Step 1	PF4V1	ENSG00000109272.3	4	73853189	73854155	WBC	0.0014	DGN	AA	rs370655	26805783	EA+AA	WBC#	4	74903134	74037417	CXCL3	C	T	0.422321	0.0441239	0.00422339	1.5e-25
Step 1	PF4V1	ENSG00000109272.3	4	73853189	73854155	WBC	0.0014	DGN	AA	rs370655	26805783	EA	WBC#	4	74903134	74037417	CXCL3	C	T	0.398027	0.0482211	0.00470955	1.33e-24
Step 1	PF4V1	ENSG00000109272.3	4	73853189	73854155	WBC	0.0014	DGN	AA	rs546829	24777453	EA	WBC#	4	74956372	74090655	CXCL2	A	T	0.3819	0.0067	0.001	6.94e-12
Step 1	PF4V1	ENSG00000109272.3	4	73853189	73854155	WBC	0.0014	DGN	AA	rs546829	27346689	EA+AA+HL	WBC#	4	74956372	74090655	CXCL2	NA	NA	0.3803	NA	NA	7.93e-12
Step 1	PF4V1	ENSG00000109272.3	4	73853189	73854155	WBC	0.0014	DGN	AA	rs546829	26805783	EA+AA	WBC#	4	74956372	74090655	PPBPP2-CXCL2	T	A	0.620254	-0.048481	0.004105	3.46e-32
Step 1	PF4V1	ENSG00000109272.3	4	73853189	73854155	WBC	0.0014	DGN	AA	rs546829	26805783	EA	WBC#	4	74956372	74090655	PPBPP2-CXCL2	T	A	0.620528	-0.0570925	0.00456163	6.12e-36
Step 1	PF4V1	ENSG00000109272.3	4	73853189	73854155	WBC	0.0014	DGN	AA	rs549280	29403010	Japanese	WBC#	4	74971196	74105479	CXCL2;MTHFD2L	A	G	0.563	-0.044	0.004	9.23e-25
Step 1	IL4	ENSG00000113520.10	5	132673986	132682676	WBC	0.00023	DGN	AA	rs10075801	27863252	European	WBC#	5	131677642	132341949	AC034220.3/SLC22A4	G	A	0.4856	-0.0381681	0.00362588	6.52e-26
Step 2	ABCA13	ENSG00000179869.14	7	48171458	48647496	WBC	1.29e-05	DGN	AA	rs7809597	32888494	European	WBC#	7	47375200	47335602	TNS3	T	C	0.394321	-0.0153091	0.00217638	2e-12
Step 2	PSMB7	ENSG00000136930.12	9	124353466	124415444	WBC	1.04e-05	DGN	AA	rs10986338	32888494	European	WBC#	9	127191232	124428953		A	G	0.651337	-0.0183027	0.00223603	2.72e-16
Step 2	PSMB7	ENSG00000136930.12	9	124353466	124415444	WBC	1.04e-05	DGN	AA	rs10986338	32888493	European	WBC#	9	127191232	124428953		A	G	0.6498	-0.016612	0.001953	1.93e-17
Step 1	ODF2	ENSG00000136811.16	9	128455186	128501292	WBC	3.95e-05	DGN	AA	rs12341940	27486782	AfricanAmerican	WBC#	9	131515148	128752869	ZER1	G	T	0.279934	0.151962	0.0388265	9.08e-05
Step 1	ODF2	ENSG00000136811.16	9	128455186	128501292	WBC	3.95e-05	DGN	AA	rs12341940	27486782	EUR+AA	WBC#	9	131515148	128752869	ZER1	G	T	0.0772154	0.152147	0.0384587	7.62e-05
Step 2	FAS	ENSG00000026103.21	10	88990582	89015785	WBC	8.34e-05	DGN	AA	rs2246828	32888494	European	WBC#	10	91005952	89246195	LIPA	A	G	0.298537	0.0187099	0.00232236	7.86e-16
Step 1	ENG	ILMN_1760778.ENSG00000106991	9	127815012	127854756	HCT	0.00265	MESA	AA	rs67145503	27863252	European	HCT	9	130628524	127866245	AK1;MIR4672;RP11-203J24.9	A	T	0.1169	0.0474338	0.00557533	1.77e-17
Step 2	SMAGP	ILMN_2380243.ENSG00000170545	12	51244558	51270890	HCT	7.98e-05	MESA	AA	rs3847858	29403010	Japanese	HCT	12	52318378	51924594	ACVRL1;ACVR1B	T	A	0.295	0.028	0.005	9.26e-10
Step 1	ENG	ILMN_1760778.ENSG00000106991	9	127815012	127854756	HGB	0.00344	MESA	AA	rs67145503	27863252	European	HGB	9	130628524	127866245	AK1;MIR4672;RP11-203J24.9	A	T	0.1168	0.0490761	0.00560059	1.91e-18
Step 1	BAZ2B	ILMN_1720850.ENSG00000123636	2	159318979	159616692	PLT	3.98e-05	MESA	AA	rs12052715	27863252	European	PLT	2	160677375	159820864	LY75-CD302_LY75	G	C	0.7247	-0.031029	0.0035878	2.72e-17
Step 1	BAZ2B	ILMN_1720850.ENSG00000123636	2	159318979	159616692	PLT	3.98e-05	MESA	AA	rs12692566	27346686	CombinedAncestry	PLT	2	160676427	159819916	LY75-CD302	A	C	0.83	-0.026	NA	2.27e-06
Step 1	BAZ2B	ILMN_1720850.ENSG00000123636	2	159318979	159616692	PLT	3.98e-05	MESA	AA	rs147820690	28787443	European	PLT	2	160735174	159878663	LY75-CD302	T	C	0.0026	0.1654	0.0287	8.19e-09
Step 1	BAZ2B	ILMN_1720850.ENSG00000123636	2	159318979	159616692	PLT	3.98e-05	MESA	AA	rs148440689	27863252	European	PLT	2	160604541	159748030	2021-03-07	A	G	0.024	0.07859	0.01047	1.7e-16
Step 1	BAZ2B	ILMN_1720850.ENSG00000123636	2	159318979	159616692	PLT	3.98e-05	MESA	AA	rs78446341	27346686	CombinedAncestry	PLT	2	160690656	159834145	LY75-CD302	A	G	0.018	0.094	NA	3.06e-10
Step 1	BAZ2B	ILMN_1720850.ENSG00000123636	2	159318979	159616692	PLT	3.98e-05	MESA	AA	rs78685880	29403010	Japanese	PLT	2	160706544	159850033	LY75;LY75-CD302	G	A	0.026	0.118	0.015	6.7e-16
Step 1	CD36	ILMN_1784863.ENSG00000135218	7	80369575	80679277	PLT	6.98e-06	MESA	AA	rs139761834	29403010	Japanese	PLT	7	80174361	80545045	GNAT3;CD36	C	T	0.045	-0.1	0.012	2.23e-17
Step 1	CD36	ILMN_1784863.ENSG00000135218	7	80369575	80679277	PLT	6.98e-06	MESA	AA	rs6961069	27863252	European	PLT	7	80218961	80589645	CD36	T	C	0.4042	0.025945	0.0032305	4.13e-12
Step 1	RAB3GAP1	ILMN_1739876.ENSG00000115839	2	135052265	135176394	WBC	0.0001	MESA	AA	rs35837297	26805783	AfricanAmerican	WBC#	2	136594439	135836869	LCT	C	T	0.0245793	0.19478	0.02968	1.54e-08
Step 1	RAB3GAP1	ILMN_1739876.ENSG00000115839	2	135052265	135176394	WBC	0.0001	MESA	AA	rs35837297	26805783	EA+AA	WBC#	2	136594439	135836869	LCT	C	T	0.00337948	0.199268	0.033411	2.46e-09
Step 1	RAB3GAP1	ILMN_1739876.ENSG00000115839	2	135052265	135176394	WBC	0.0001	MESA	AA	rs35940156	26805783	AfricanAmerican	WBC#	2	136575300	135817730	LCT	T	C	0.0243111	0.18915	0.02998	4.27e-08
Step 1	RAB3GAP1	ILMN_1739876.ENSG00000115839	2	135052265	135176394	WBC	0.0001	MESA	AA	rs35940156	26805783	EA+AA	WBC#	2	136575300	135817730	LCT	T	C	0.0035455	0.19869	0.0338196	4.23e-09
Step 1	RAB3GAP1	ILMN_1739876.ENSG00000115839	2	135052265	135176394	WBC	0.0001	MESA	AA	rs75874749	29403010	Japanese	WBC#	2	136713108	135955538	DARS	C	T	0.153	0.067	0.006	6.75e-30
Step 1	RAB3GAP1	ILMN_1739876.ENSG00000115839	2	135052265	135176394	WBC	0.0001	MESA	AA	rs76927619	26805783	EA+AA	WBC#	2	135878409	135120839	RAB3GAP1	T	G	0.00303661	0.193308	0.036532	1.21e-07
Step 1	DARS	ILMN_1813836.ENSG00000115866	2	135906677	135986100	WBC	3.83e-05	MESA	AA	rs35837297	26805783	AfricanAmerican	WBC#	2	136594439	135836869	LCT	C	T	0.0245793	0.19478	0.02968	1.54e-08
Step 1	DARS	ILMN_1813836.ENSG00000115866	2	135906677	135986100	WBC	3.83e-05	MESA	AA	rs35837297	26805783	EA+AA	WBC#	2	136594439	135836869	LCT	C	T	0.00337948	0.199268	0.033411	2.46e-09
Step 1	DARS	ILMN_1813836.ENSG00000115866	2	135906677	135986100	WBC	3.83e-05	MESA	AA	rs35940156	26805783	AfricanAmerican	WBC#	2	136575300	135817730	LCT	T	C	0.0243111	0.18915	0.02998	4.27e-08
Step 1	DARS	ILMN_1813836.ENSG00000115866	2	135906677	135986100	WBC	3.83e-05	MESA	AA	rs35940156	26805783	EA+AA	WBC#	2	136575300	135817730	LCT	T	C	0.0035455	0.19869	0.0338196	4.23e-09
Step 1	DARS	ILMN_1813836.ENSG00000115866	2	135906677	135986100	WBC	3.83e-05	MESA	AA	rs75874749	29403010	Japanese	WBC#	2	136713108	135955538	DARS	C	T	0.153	0.067	0.006	6.75e-30
Step 1	DARS	ILMN_1813836.ENSG00000115866	2	135906677	135986100	WBC	3.83e-05	MESA	AA	rs76927619	26805783	EA+AA	WBC#	2	135878409	135120839	RAB3GAP1	T	G	0.00303661	0.193308	0.036532	1.21e-07
Step 1	BCS1L	ILMN_1738529.ENSG00000074582	2	218658764	218663443	WBC	0.000157	MESA	AA	rs10932765	25096241	AfricanAmerican	WBC#	2	219099484	218234761	ARPC2	C	T	0.877	0.0039	0.0056	0.726
Step 1	BCS1L	ILMN_1738529.ENSG00000074582	2	218658764	218663443	WBC	0.000157	MESA	AA	rs10932765	25096241	EA	WBC#	2	219099484	218234761	ARPC2	C	T	0.503	0.011	0.003	3.36e-05
Step 1	BCS1L	ILMN_1738529.ENSG00000074582	2	218658764	218663443	WBC	0.000157	MESA	AA	rs10932765	25096241	Japanese	WBC#	2	219099484	218234761	ARPC2	C	T	0.58	0.012	0.003	1.69e-05
Step 1	BCS1L	ILMN_1738529.ENSG00000074582	2	218658764	218663443	WBC	0.000157	MESA	AA	rs114050631	27863252	European	WBC#	2	219020958	218156235	NA	T	C	0.0107	-0.141171	0.019411	3.52e-13
Step 1	BCS1L	ILMN_1738529.ENSG00000074582	2	218658764	218663443	WBC	0.000157	MESA	AA	rs55799208	27863252	European	WBC#	2	218999982	218135259	CXCR2	A	G	0.0029	-0.42245	0.0358993	5.73e-32
Step 1	BCS1L	ILMN_1738529.ENSG00000074582	2	218658764	218663443	WBC	0.000157	MESA	AA	rs55799208	26805783	EA+AA	WBC#	2	218999982	218135259	CXCR2	A	G	0.00220757	-0.259568	0.0396422	5.84e-11
Step 1	BCS1L	ILMN_1738529.ENSG00000074582	2	218658764	218663443	WBC	0.000157	MESA	AA	rs55799208	26805783	EA	WBC#	2	218999982	218135259	CXCR2	A	G	0.00258044	-0.265315	0.0405092	5.77e-11
Step 1	BCS1L	ILMN_1738529.ENSG00000074582	2	218658764	218663443	WBC	0.000157	MESA	AA	rs61733609	27486782	EUR+AA	WBC#	2	219000267	218135544	CXCR2	G	A	0.00132802	-0.786822	0.190269	3.54e-05
Step 1	BCS1L	ILMN_1738529.ENSG00000074582	2	218658764	218663443	WBC	0.000157	MESA	AA	rs61733609	27486782	European	WBC#	2	219000267	218135544	CXCR2	G	A	0.00149917	-0.787633	0.194238	5.01e-05
Step 1	BCS1L	ILMN_1738529.ENSG00000074582	2	218658764	218663443	WBC	0.000157	MESA	AA	rs61733609	26805783	EA+AA	WBC#	2	219000267	218135544	CXCR2	A	G	0.00151543	-0.480942	0.052842	8.91e-20
Step 1	BCS1L	ILMN_1738529.ENSG00000074582	2	218658764	218663443	WBC	0.000157	MESA	AA	rs61733609	26805783	EA	WBC#	2	219000267	218135544	CXCR2	A	G	0.00184781	-0.480559	0.0529977	1.22e-19
Step 1	BCS1L	ILMN_1738529.ENSG00000074582	2	218658764	218663443	WBC	0.000157	MESA	AA	rs78107966	29403010	Japanese	WBC#	2	219062001	218197278	CXCR1;ARPC2	C	T	0.191	-0.038	0.006	2.54e-11
Step 2	PSMD3	ILMN_1796430.ENSG00000108344	17	39980797	39997960	WBC	0.00896	MESA	AA	rs8078723	32888494	European	WBC#	17	38166879	40010626	CSF3	C	T	0.388377	0.107756	0.0021751	0
Step 2	PSMD3	ILMN_1796430.ENSG00000108344	17	39980797	39997960	WBC	0.00896	MESA	AA	rs146890554	32888494	European	WBC#	17	38173637	40017384	CSF3	T	C	0.013927	-0.0844458	0.00919156	4.03e-20
Step 2	PSMD3	ILMN_1796430.ENSG00000108344	17	39980797	39997960	WBC	0.00896	MESA	AA	rs2302774	32888494	European	WBC#	17	38183090	40026837	MED24	T	G	0.382159	-0.0956877	0.00218947	0
Step 2	PSMD3	ILMN_1796430.ENSG00000108344	17	39980797	39997960	WBC	0.00896	MESA	AA	rs553814563	32888494	European	WBC#	17	38303605	40147352	CASC3	G	A	0.001815	-0.135769	0.0250373	5.8716e-08
Step 2	PSMD3	ILMN_1796430.ENSG00000108344	17	39980797	39997960	WBC	0.00896	MESA	AA	rs34223321	32888494	European	WBC#	17	rs34223321	40196136	RAPGEFL1	A	C	0.300547	0.0338056	0.00230887	1.52e-48
Step 1	SERINC4	ENSG00000184716	15	43794162	43800221	HGB	0.00176	DGN	HL	rs147233090	27863252	European	HGB	15	44028047	43735849	CATSPER2P1	T	C	0.0241	-0.0928193	0.011921	6.91e-15
Step 1	SERINC4	ENSG00000184716	15	43794162	43800221	HGB	0.00176	DGN	HL	rs55707100	27346685	EA	HGB	15	43820717	43528519	MAP1A	T	C	0.033	-0.071	0.013	1.65e-08
Step 2	ZDHHC18	ENSG00000204160	1	26826710	26857602	PLT	0.0013	DGN	HL	rs114165349	32888494	European	PLT	1	27021913	26695422	ARID1A,RP5-968P14.2	C	G	0.023304	0.0739405	0.00699402	4.02e-26
Step 1	TRAM2	ENSG00000065308	6	52497402	52576915	PLT	0.000195	DGN	HL	rs146253696	29403010	Japanese	PLT	6	52717765	52852967	GSTA5;GSTA3	A	G	0.117	0.039	0.007	8.07e-09
Step 1	TRAM2	ENSG00000065308	6	52497402	52576915	PLT	0.000195	DGN	HL	rs2078064	27863252	European	PLT	6	52267254	52402456	PAQR8	A	G	0.11	0.034746	0.0050136	6.97e-11
Step 1	TRAM2	ENSG00000065308	6	52497402	52576915	PLT	0.000195	DGN	HL	rs2894802	27863252	European	PLT	6	52656169	52791371	GSTA1	G	T	0.5733	-0.02813	0.0031613	2.73e-14
Step 1	CLN3	ENSG00000188603	16	28474111	28495575	PLT	0.00111	DGN	HL	rs151233	27863252	European	PLT	16	28506428	28495107	APOBR	T	C	0.1308	0.066319	0.0046417	4.28e-33
Step 2	BTBD17	ENSG00000204347	17	74356416	74361946	PLT	0.00369	DGN	HL	rs2084312	32888494	European	PLT	17	72695211	74699072	RAB37,CD300LF	T	C	0.79993	0.0240054	0.00263855	9.21e-20
Step 2	GRK7	ENSG00000114124	3	141778148	141818490	WBC	9.11e-05	DGN	HL	rs11712552	32888494	European	WBC#	3	140957762	141238920	ACPL2	G	A	0.127061	0.0297115	0.00319162	1.29e-20
Step 2	GRK7	ENSG00000114124	3	141778148	141818490	WBC	9.11e-05	DGN	HL	rs9819371	32888494	European	WBC#	3	141206800	141487958	RASA2	T	C	0.064547	-0.0481086	0.00431056	6.35e-29
Step 2	GRK7	ENSG00000114124	3	141778148	141818490	WBC	9.11e-05	DGN	HL	rs9819371	32888493	Trans-ethnic	WBC#	3	141206800	141487958	RASA2	T	C	0.0639	NA	NA	3.34e-28
Step 2	GRK7	ENSG00000114124	3	141778148	141818490	WBC	9.11e-05	DGN	HL	rs4441632	32888494	European	WBC#	3	141592658	141873816	ATP1B3	C	T	0.51205	-0.0132799	0.00211977	3.73e-10
Step 2	LRPAP1	ENSG00000163956	4	3506376	3532559	WBC	0.000185	DGN	HL	rs2024115	32888494	European	WBC#	4	3104568	3102841	HTT	G	A	0.382427	-0.0153548	0.00219013	2.37e-12
Step 1	BAK1	ENSG00000030110	6	33572547	33580293	WBC	1.53e-05	DGN	HL	rs2071474	27346689	EA+AA+HL	WBC#	6	32782582	32814805	HLA-DOB	NA	NA	0.2676	NA	NA	3.66e-07
Step 2	LTBP3	ENSG00000168056	11	65538805	65558930	WBC	6.17e-05	DGN	HL	rs7107912	32888494	European	WBC#	11	65603252	65835781	SNX32,CFL1	A	G	0.507879	0.0195501	0.0021223	0.507879
Step 2	LTBP3	ENSG00000168056	11	65538805	65558930	WBC	6.17e-05	DGN	HL	rs7107912	32888493	Trans-ethnic	WBC#	11	65603252	65835781	SNX32,CFL1	A	G	0.4354	NA	NA	8.45e-23
Step 1	CD27	ENSG00000139193	12	6444867	6451718	WBC	2.42e-05	DGN	HL	rs10466905	27863252	European	WBC#	12	6502832	6393666	RP1-102E24.8	A	G	0.1918	0.0399174	0.00458113	2.95e-18
Step 1	PLD2	ENSG00000129219	17	4807096	4823434	WBC	3.51e-05	DGN	HL	rs138171347	27863252	European	WBC#	17	5183203	5279908	RABEP1	A	AAAAT	0.4973	0.0247971	0.00357217	3.87e-12
Step 2	SMAD6	ILMN_1767068.ENSG00000137834	15	66702228	66782849	HCT	8.55e-06	MESA	HL	rs8030097	32888494	European	HCT	15	66943404	66651066	RP11-321F6.1	G	C	0.809846	0.0232267	0.00272969	1.76e-17
Step 2	SMAD6	ILMN_1767068.ENSG00000137834	15	66702228	66782849	HCT	8.55e-06	MESA	HL	rs8030097	32888493	Trans-ethnic	HCT	15	66943404	66651066	RP11-321F6.1	G	C	0.8174	NA	NA	8.66e-20
Step 2	SMAD6	ILMN_1767068.ENSG00000137834	15	66702228	66782849	HCT	8.55e-06	MESA	HL	rs181000569	32888494	European	HCT	15	67166007	66873669		A	C	0.011043	0.0785278	0.0102541	1.89e-14
Step 2	SMAD6	ILMN_1767068.ENSG00000137834	15	66702228	66782849	HCT	8.55e-06	MESA	HL	rs72743481	32888494	European	HCT	15	67465547	67173209	SMAD3	C	T	0.324489	0.0147667	0.00229142	1.16e-10
Step 1	SMAD6	ILMN_1767068.ENSG00000137834	15	66702228	6678284	HGB	4.77e-05	MESA	HL	rs11377084	27863252	European	HGB	15	66944221	66651883	RP11-321F6.1	TA	T	0.5596	-0.0222333	0.00362599	8.7e-10
Step 1	SMAD6	ILMN_1767068.ENSG00000137834	15	66702228	6678284	HGB	4.77e-05	MESA	HL	rs557277320	27863252	European	HGB	15	66049600	65757262	DENND4A;RAB11A	T	TG	0.4412	-0.0211226	0.0036072	4.75e-09
Step 2	PAQR8	ILMN_1694589.ENSG00000170915	6	52361421	52407777	PLT	0.00127	MESA	HL	rs12662189	32888494	European	PLT	6	52267181	52402383	PAQR8	C	T	0.110565	0.0231861	0.00337731	6.64e-12
Step 2	PAQR8	ILMN_1694589.ENSG00000170915	6	52361421	52407777	PLT	0.00127	MESA	HL	rs4715332	32888494	European	PLT	6	52669185	52804387	GSTA1	A	C	0.572131	-0.0252412	0.00213693	3.39e-32
Step 2	TNFAIP2	ILMN_1727689.ENSG00000185215	14	103123442	103137439	PLT	0.0081	MESA	HL	rs2297066	32888494	European	PLT	14	103566835	103100498	EXOC3L4	G	C	0.243018	0.0516451	0.0024598	7.19e-98
Step 2	TNFAIP2	ILMN_1727689.ENSG00000185215	14	103123442	103137439	PLT	0.0081	MESA	HL	rs2297066	32888493	Trans-ethnic	PLT	14	103566835	103100498	EXOC3L4	G	C	0.2418	NA	NA	1.44e-120
Step 2	TNFAIP2	ILMN_1727689.ENSG00000185215	14	103123442	103137439	PLT	0.0081	MESA	HL	rs729183	32888494	European	PLT	14	103576443	103110106	EXOC3L4	C	T	0.218733	-0.0229353	0.00269502	1.74e-17
Step 1	BAK1	ILMN_1805990.ENSG00000030110	6	33572547	33580293	WBC	0.000146	MESA	HL	rs2071474	27346689	EA+AA+HL	WBC#	6	32782582	32814805	HLA-DOB	NA	NA	0.2676	NA	NA	3.66e-07
Step 1	ATXN2	ILMN_1743829.ENSG00000204842	12	111443485	111599676	WBC	0.00212	MESA	HL	rs10774625	26805783	EA+AA	WBC#	12	111910219	111472415	ATXN2	G	A	0.563246	-0.0437354	0.00451792	3.65e-22
Step 1	ATXN2	ILMN_1743829.ENSG00000204842	12	111443485	111599676	WBC	0.00212	MESA	HL	rs10774625	26805783	EA	WBC#	12	111910219	111472415	ATXN2	G	A	0.495526	-0.0451605	0.00473379	1.43e-21
Step 1	ATXN2	ILMN_1743829.ENSG00000204842	12	111443485	111599676	WBC	0.00212	MESA	HL	rs11065987	26805783	EA+AA	WBC#	12	112072424	111634620	ATXN2-BRAP	G	A	0.378043	0.0359288	0.00457476	4.04e-15
Step 1	ATXN2	ILMN_1743829.ENSG00000204842	12	111443485	111599676	WBC	0.00212	MESA	HL	rs11065987	26805783	EA	WBC#	12	112072424	111634620	ATXN2-BRAP	G	A	0.436294	0.0369513	0.00477732	1.04e-14
Step 1	ATXN2	ILMN_1743829.ENSG00000204842	12	111443485	111599676	WBC	0.00212	MESA	HL	rs11066301	26805783	EA+AA	WBC#	12	112871372	112433568	PTPN11	G	A	0.38327	0.0355844	0.00495187	6.67e-13
Step 1	ATXN2	ILMN_1743829.ENSG00000204842	12	111443485	111599676	WBC	0.00212	MESA	HL	rs11066301	26805783	EA	WBC#	12	112871372	112433568	PTPN11	G	A	0.445669	0.0359731	0.0051837	3.93e-12
Step 1	ATXN2	ILMN_1743829.ENSG00000204842	12	111443485	111599676	WBC	0.00212	MESA	HL	rs17696736	26805783	EA+AA	WBC#	12	112486818	112049014	NAA25	G	A	0.387595	0.0333881	0.00455659	2.35e-13
Step 1	ATXN2	ILMN_1743829.ENSG00000204842	12	111443485	111599676	WBC	0.00212	MESA	HL	rs17696736	26805783	EA	WBC#	12	112486818	112049014	NAA25	G	A	0.447561	0.0342538	0.00475887	6.12e-13
Step 1	ATXN2	ILMN_1743829.ENSG00000204842	12	111443485	111599676	WBC	0.00212	MESA	HL	rs2040571	29403010	Japanese	WBC#	12	111357727	110919923	MYL2	A	G	0.221	0.04	0.006	1.15e-12
Step 1	ATXN2	ILMN_1743829.ENSG00000204842	12	111443485	111599676	WBC	0.00212	MESA	HL	rs3184504	27863252	European	WBC#	12	111884608	111446804	SH2B3	C	T	0.5175	-0.0630864	0.00357311	9.17e-70
Step 1	ATXN2	ILMN_1743829.ENSG00000204842	12	111443485	111599676	WBC	0.00212	MESA	HL	rs3184504	24777453	EA	WBC#	12	111884608	111446804	SH2B3	T	C	0.4965	0.0056	0.0009	4.26e-10
Step 1	ATXN2	ILMN_1743829.ENSG00000204842	12	111443485	111599676	WBC	0.00212	MESA	HL	rs3184504	26805783	EA+AA	WBC#	12	111884608	111446804	SH2B3	C	T	0.572337	-0.0442875	0.00452301	1.22e-22
Step 1	ATXN2	ILMN_1743829.ENSG00000204842	12	111443485	111599676	WBC	0.00212	MESA	HL	rs3184504	26805783	EA	WBC#	12	111884608	111446804	SH2B3	C	T	0.506154	-0.04587	0.00473667	3.53e-22
Step 1	ATXN2	ILMN_1743829.ENSG00000204842	12	111443485	111599676	WBC	0.00212	MESA	HL	rs555346412	27863252	European	WBC#	12	112629667	112191863	HECTD4	C	G	0.0017	0.288496	0.0468188	7.18e-10
Step 1	ATXN2	ILMN_1743829.ENSG00000204842	12	111443485	111599676	WBC	0.00212	MESA	HL	rs653178	26805783	EA+AA	WBC#	12	112007756	111569952	ATXN2	T	C	0.571253	-0.0441958	0.00452115	1.44e-22
Step 1	ATXN2	ILMN_1743829.ENSG00000204842	12	111443485	111599676	WBC	0.00212	MESA	HL	rs653178	26805783	EA	WBC#	12	112007756	111569952	ATXN2	T	C	0.504855	-0.0455772	0.00473527	6.27e-22
Step 1	ABO	ENSG00000175164	9	133250401	133275219	HGB	0.138	DGN	AA	rs10901252	27863252	European	HGB	9	136128000	133252613	RP11-430N14.4;ABO	C	G	0.065	0.076	0.007	2.23e-25
Step 1	ABO	ENSG00000175164	9	133250401	133275219	HGB	0.138	DGN	AA	rs2519796	27863252	European	HGB	9	136825333	133960211	VAV2	A	G	0.667	-0.024	0.004	3.61e-10
Step 1	ABO	ENSG00000175164	9	133250401	133275219	HGB	0.138	DGN	AA	rs495828	20139978	Japanese	HGB	9	136154867	133279294	ABO	T	G	0.28	-0.089	0.013	1.18e-11
Step 1	ABO	ENSG00000175164	9	133250401	133275219	HGB	0.138	DGN	AA	rs7853989	23222517	European	HGB	9	136131592	133256205	ABO	NA	NA	NA	NA	NA	1.1e-17
Step 1	HBZ	ENSG00000130656	16	152687	154503	HGB	0.0909	DGN	AA	rs11863726	23103231	AfricanAmerican	HGB	16	230578	180579	HBQ1	G	A	0.271	-0.13	0.02	8.9e-11
Step 1	HBZ	ENSG00000130656	16	152687	154503	HGB	0.0909	DGN	AA	rs13335497	23103231	AfricanAmerican	HGB	16	310005	260006	ITFG3	A	G	0.069	-0.344	0.036	1.8e-21
Step 1	HBZ	ENSG00000130656	16	152687	154503	HGB	0.0909	DGN	AA	rs13335629	23446634	AfricanAmerican	HGB	16	310380	260381	ITFG3;LUCL7;NPRL3;POLR3K;RPL2B;MPG	A	G	0.12	-0.19	0.019	2.63e-23
Step 1	HBZ	ENSG00000130656	16	152687	154503	HGB	0.0909	DGN	AA	rs2562181	28017375	AfricanAmerican	HGB	16	141659	91661	NPRL3;MPG	T	C	0.32	-0.098	0.013	5.05e-14
Step 1	HBZ	ENSG00000130656	16	152687	154503	HGB	0.0909	DGN	AA	rs530159671	27863252	European	HGB	16	250184	200185	LUC7L	A	G	0.002	-0.307	0.049	4.28e-10
Step 1	HBZ	ENSG00000130656	16	152687	154503	HGB	0.0909	DGN	AA	rs7203560	23263863	AfricanAmerican	HGB	16	184390	134391	16p13.3	G	T	0.061	-0.199	0.036	2.23e-08
Step 1	HBZ	ENSG00000130656	16	152687	154503	HGB	0.0909	DGN	AA	rs8055546	27863252	European	HGB	16	249022	199023	LUC7L	T	C	0.068	0.048	0.007	6.93e-12
Step 1	HBZ	ENSG00000130656	16	152687	154503	HGB	0.0909	DGN	AA	rs9924561	23103231	AfricanAmerican	HGB	16	314780	264781	ITFG3	G	T	0.066	-0.389	0.038	6.6e-24
Step 1	HBQ1	ENSG00000086506	16	180453	181181	HGB	0.214	DGN	AA	rs11863726	23103231	AfricanAmerican	HGB	16	230578	180579	HBQ1	G	A	0.271	-0.13	0.02	8.9e-11
Step 1	HBQ1	ENSG00000086506	16	180453	181181	HGB	0.214	DGN	AA	rs13335497	23103231	AfricanAmerican	HGB	16	310005	260006	ITFG3	A	G	0.069	-0.344	0.036	1.8e-21
Step 1	HBQ1	ENSG00000086506	16	180453	181181	HGB	0.214	DGN	AA	rs13335629	23446634	AfricanAmerican	HGB	16	310380	260381	ITFG3;LUCL7;NPRL3;POLR3K;RPL2B;MPG	A	G	0.12	-0.19	0.019	2.63e-23
Step 1	HBQ1	ENSG00000086506	16	180453	181181	HGB	0.214	DGN	AA	rs2562181	28017375	AfricanAmerican	HGB	16	141659	91661	NPRL3;MPG	T	C	0.32	-0.098	0.013	5.05e-14
Step 1	HBQ1	ENSG00000086506	16	180453	181181	HGB	0.214	DGN	AA	rs530159671	27863252	European	HGB	16	250184	200185	LUC7L	A	G	0.002	-0.307	0.049	4.28e-10
Step 1	HBQ1	ENSG00000086506	16	180453	181181	HGB	0.214	DGN	AA	rs7203560	23263863	AfricanAmerican	HGB	16	184390	134391	16p13.3	G	T	0.061	-0.199	0.036	2.23e-08
Step 1	HBQ1	ENSG00000086506	16	180453	181181	HGB	0.214	DGN	AA	rs8055546	27863252	European	HGB	16	249022	199023	LUC7L	T	C	0.068	0.048	0.007	6.93e-12
Step 1	HBQ1	ENSG00000086506	16	180453	181181	HGB	0.214	DGN	AA	rs9924561	23103231	AfricanAmerican	HGB	16	314780	264781	ITFG3	G	T	0.066	-0.389	0.038	6.6e-24
Step 1	RAB11FIP3	ENSG00000090565	16	425619	523011	HGB	0.217	DGN	AA	rs11863726	23103231	AfricanAmerican	HGB	16	230578	180579	HBQ1	G	A	0.271	-0.13	0.02	8.9e-11
Step 1	RAB11FIP3	ENSG00000090565	16	425619	523011	HGB	0.217	DGN	AA	rs13335497	23103231	AfricanAmerican	HGB	16	310005	260006	ITFG3	A	G	0.069	-0.344	0.036	1.8e-21
Step 1	RAB11FIP3	ENSG00000090565	16	425619	523011	HGB	0.217	DGN	AA	rs13335629	23446634	AfricanAmerican	HGB	16	310380	260381	ITFG3;LUCL7;NPRL3;POLR3K;RPL2B;MPG	A	G	0.12	-0.19	0.019	2.63e-23
Step 1	RAB11FIP3	ENSG00000090565	16	425619	523011	HGB	0.217	DGN	AA	rs2562181	28017375	AfricanAmerican	HGB	16	141659	91661	NPRL3;MPG	T	C	0.32	-0.098	0.013	5.05e-14
Step 1	RAB11FIP3	ENSG00000090565	16	425619	523011	HGB	0.217	DGN	AA	rs530159671	27863252	European	HGB	16	250184	200185	LUC7L	A	G	0.002	-0.307	0.049	4.28e-10
Step 1	RAB11FIP3	ENSG00000090565	16	425619	523011	HGB	0.217	DGN	AA	rs7203560	23263863	AfricanAmerican	HGB	16	184390	134391	16p13.3	G	T	0.061	-0.199	0.036	2.23e-08
Step 1	RAB11FIP3	ENSG00000090565	16	425619	523011	HGB	0.217	DGN	AA	rs8055546	27863252	European	HGB	16	249022	199023	LUC7L	T	C	0.068	0.048	0.007	6.93e-12
Step 1	RAB11FIP3	ENSG00000090565	16	425619	523011	HGB	0.217	DGN	AA	rs9924561	23103231	AfricanAmerican	HGB	16	314780	264781	ITFG3	G	T	0.066	-0.389	0.038	6.6e-24
Step 1	PLOD1	ENSG00000083444	1	11934205	11975538	PLT	0.292	DGN	AA	rs11121845	27863252	European	PLT	1	12028655	11968598	PLOD1	T	C	0.463	-0.039	0.003	1.04e-25
Step 1	PLOD1	ENSG00000083444	1	11934205	11975538	PLT	0.292	DGN	AA	rs2336384	22139419	European	PLT	1	12046063	11986006	MFN2	G	T	NA	2.172	0.382	1.25e-08
Step 1	MFN2	ENSG00000116688	1	11980181	12013514	PLT	0.181	DGN	AA	rs11121845	27863252	European	PLT	1	12028655	11968598	PLOD1	T	C	0.463	-0.039	0.003	1.04e-25
Step 1	MFN2	ENSG00000116688	1	11980181	12013514	PLT	0.181	DGN	AA	rs2336384	22139419	European	PLT	1	12046063	11986006	MFN2	G	T	NA	2.172	0.382	1.25e-08
Step 1	LDLRAP1	ENSG00000157978	1	25543580	25568886	PLT	0.902	DGN	AA	rs111941366	27863252	European	PLT	1	25736369	25409878	RHCE	T	C	0.45	-0.047	0.003	6.44e-32
Step 1	LDLRAP1	ENSG00000157978	1	25543580	25568886	PLT	0.902	DGN	AA	rs12096438	27863252	European	PLT	1	25889422	25562931	LDLRAP1	T	C	0.533	-0.028	0.003	6.7e-10
Step 1	LDLRAP1	ENSG00000157978	1	25543580	25568886	PLT	0.902	DGN	AA	rs3091242	27346686	CombinedAncestry	PLT	1	25674785	25348294	TMEM50A	T	C	0.5	-0.02	NA	1.03e-05
Step 2	EHD3	ENSG00000013016	2	31234337	31269447	PLT	0.0502	DGN	AA	rs655029	32888494	European	PLT	2	31477838	31254972	EHD3	A	G	0.711	0.069	0.002	8.44e-192
Step 1	BAK1	ENSG00000030110	6	33572547	33580293	PLT	0.273	DGN	AA	rs210134	22139419	European	PLT	6	33540209	33572432	BAK1	G	A	NA	4.957	0.396	7.11e-36
Step 1	BAK1	ENSG00000030110	6	33572547	33580293	PLT	0.273	DGN	AA	rs210135	19820697	European	PLT	6	33540692	33572915	BAK1	A	T	0.68	5.438	0.868	3.7e-10
Step 1	BAK1	ENSG00000030110	6	33572547	33580293	PLT	0.273	DGN	AA	rs210139	24777453	European	PLT	6	33543409	33575632	BAK1	a	c	0.61	-4.433	0.528	4.66e-17
Step 1	BAK1	ENSG00000030110	6	33572547	33580293	PLT	0.273	DGN	AA	rs210142	27863252	European	PLT	6	33546837	33579060	BAK1	C	T	0.702	0.081	0.004	1.19e-144
Step 1	BAK1	ENSG00000030110	6	33572547	33580293	PLT	0.273	DGN	AA	rs210143	29403010	Japanese	PLT	6	33546930	33579153	BAK1	C	T	0.782	0.055	0.005	2.44e-27
Step 1	BAK1	ENSG00000030110	6	33572547	33580293	PLT	0.273	DGN	AA	rs210170	27346686	CombinedAncestry	PLT	6	33525680	33557903	BAK1	C	T	0.655	0.048	NA	6.23e-26
Step 1	BAK1	ENSG00000030110	6	33572547	33580293	PLT	0.273	DGN	AA	rs399604	22139419	European	PLT	6	32975014	33007237	HLA-DOA	C	T	NA	2.346	0.365	1.3e-10
Step 1	BAK1	ENSG00000030110	6	33572547	33580293	PLT	0.273	DGN	AA	rs449242	21153663	AfricanAmerican	PLT	6	33496714	33528937	BAK1	T	G	0.33	-0.126	0.023	6.2e-08
Step 1	BAK1	ENSG00000030110	6	33572547	33580293	PLT	0.273	DGN	AA	rs513349	23103231	AfricanAmerican	PLT	6	33541719	33573942	BAK1	A	G	0.367	-4.907	0.778	2.9e-10
Step 1	BAK1	ENSG00000030110	6	33572547	33580293	PLT	0.273	DGN	AA	rs5745568	20139978	Japanese	PLT	6	33548394	33580617	BAK1	T	G	0.23	0.09	0.014	6.66e-11
Step 1	BAK1	ENSG00000030110	6	33572547	33580293	PLT	0.273	DGN	AA	rs5745582	21153663	European	PLT	6	33546498	33578721	BAK1	T	C	0.21	0.076	0.015	7.6e-07
Step 1	BAK1	ENSG00000030110	6	33572547	33580293	PLT	0.273	DGN	AA	rs62405954	26805783	Hispanic/Latino	PLT	6	33524820	33557043	ZBTB9-BAK1	T	C	0.86	-0.239	0.037	1.1e-10
Step 1	BAK1	ENSG00000030110	6	33572547	33580293	PLT	0.273	DGN	AA	rs75080135	27863252	European	PLT	6	33552707	33584930	GGNBP1	C	A	0.177	0.071	0.004	5.82e-101
Step 1	BAK1	ENSG00000030110	6	33572547	33580293	PLT	0.273	DGN	AA	rs9277053	26064965	Korean	PLT	6	33006222	33038445	HLA-DOA-HLA-DPA1	A	G	0.34	5.18	1.049	7.95e-07
Step 1	BAK1	ENSG00000030110	6	33572547	33580293	PLT	0.273	DGN	AA	rs9296095	25705162	Korean	PLT	6	33542523	33574746	BAK1	G	A	0.23	4.8	1.17	4.24e-05
Step 1	C6orf227	ENSG00000197251	6	33586106	33593338	PLT	0.442	DGN	AA	rs210134	22139419	European	PLT	6	33540209	33572432	BAK1	G	A	NA	4.957	0.396	7.11e-36
Step 1	C6orf227	ENSG00000197251	6	33586106	33593338	PLT	0.442	DGN	AA	rs210135	19820697	European	PLT	6	33540692	33572915	BAK1	A	T	0.68	5.438	0.868	3.7e-10
Step 1	C6orf227	ENSG00000197251	6	33586106	33593338	PLT	0.442	DGN	AA	rs210139	24777453	European	PLT	6	33543409	33575632	BAK1	a	c	0.61	-4.433	0.528	4.66e-17
Step 1	C6orf227	ENSG00000197251	6	33586106	33593338	PLT	0.442	DGN	AA	rs210142	27863252	European	PLT	6	33546837	33579060	BAK1	C	T	0.702	0.081	0.004	1.19e-144
Step 1	C6orf227	ENSG00000197251	6	33586106	33593338	PLT	0.442	DGN	AA	rs210143	29403010	Japanese	PLT	6	33546930	33579153	BAK1	C	T	0.782	0.055	0.005	2.44e-27
Step 1	C6orf227	ENSG00000197251	6	33586106	33593338	PLT	0.442	DGN	AA	rs210170	27346686	CombinedAncestry	PLT	6	33525680	33557903	BAK1	C	T	0.655	0.048	NA	6.23e-26
Step 1	C6orf227	ENSG00000197251	6	33586106	33593338	PLT	0.442	DGN	AA	rs399604	22139419	European	PLT	6	32975014	33007237	HLA-DOA	C	T	NA	2.346	0.365	1.3e-10
Step 1	C6orf227	ENSG00000197251	6	33586106	33593338	PLT	0.442	DGN	AA	rs449242	21153663	AfricanAmerican	PLT	6	33496714	33528937	BAK1	T	G	0.33	-0.126	0.023	6.2e-08
Step 1	C6orf227	ENSG00000197251	6	33586106	33593338	PLT	0.442	DGN	AA	rs513349	23103231	AfricanAmerican	PLT	6	33541719	33573942	BAK1	A	G	0.367	-4.907	0.778	2.9e-10
Step 1	C6orf227	ENSG00000197251	6	33586106	33593338	PLT	0.442	DGN	AA	rs5745568	20139978	Japanese	PLT	6	33548394	33580617	BAK1	T	G	0.23	0.09	0.014	6.66e-11
Step 1	C6orf227	ENSG00000197251	6	33586106	33593338	PLT	0.442	DGN	AA	rs5745582	21153663	European	PLT	6	33546498	33578721	BAK1	T	C	0.21	0.076	0.015	7.6e-07
Step 1	C6orf227	ENSG00000197251	6	33586106	33593338	PLT	0.442	DGN	AA	rs62405954	26805783	Hispanic/Latino	PLT	6	33524820	33557043	ZBTB9-BAK1	T	C	0.86	-0.239	0.037	1.1e-10
Step 1	C6orf227	ENSG00000197251	6	33586106	33593338	PLT	0.442	DGN	AA	rs75080135	27863252	European	PLT	6	33552707	33584930	GGNBP1	C	A	0.177	0.071	0.004	5.82e-101
Step 1	C6orf227	ENSG00000197251	6	33586106	33593338	PLT	0.442	DGN	AA	rs9277053	26064965	Korean	PLT	6	33006222	33038445	HLA-DOA-HLA-DPA1	A	G	0.34	5.18	1.049	7.95e-07
Step 1	C6orf227	ENSG00000197251	6	33586106	33593338	PLT	0.442	DGN	AA	rs9296095	25705162	Korean	PLT	6	33542523	33574746	BAK1	G	A	0.23	4.8	1.17	4.24e-05
Step 1	JAZF1	ENSG00000153814	7	27830573	28180743	WBC	0.751	DGN	AA	rs2158799	27863252	European	WBC#	7	28277107	28237488	JAZF1-AS1	G	C	0.608	0.047	0.004	9.73e-37
Step 1	JAZF1	ENSG00000153814	7	27830573	28180743	WBC	0.751	DGN	AA	rs56388170	27863252	European	WBC#	7	28724374	28684757	CREB5	T	G	0.296	0.063	0.004	6.72e-56
Step 1	JAZF1	ENSG00000153814	7	27830573	28180743	WBC	0.751	DGN	AA	rs57123607	29403010	Japanese	WBC#	7	28717030	28677413	CREB5	T	C	0.268	0.041	0.005	1.84e-17
Step 1	CREB5	ENSG00000146592	7	28299321	28825894	WBC	0.21	DGN	AA	rs2158799	27863252	European	WBC#	7	28277107	28237488	JAZF1-AS1	G	C	0.608	0.047	0.004	9.73e-37
Step 1	CREB5	ENSG00000146592	7	28299321	28825894	WBC	0.21	DGN	AA	rs56388170	27863252	European	WBC#	7	28724374	28684757	CREB5	T	G	0.296	0.063	0.004	6.72e-56
Step 1	CREB5	ENSG00000146592	7	28299321	28825894	WBC	0.21	DGN	AA	rs57123607	29403010	Japanese	WBC#	7	28717030	28677413	CREB5	T	C	0.268	0.041	0.005	1.84e-17
Step2	PSMD3	ENSG00000108344	17	39980797	39997960	WBC	0.429	DGN	AA	rs8078723	32888494	European	WBC#	17	38166879	40010626	CSF3	C	T	0.388	0.108	0.002	0
Step2	PSMD3	ENSG00000108344	17	39980797	39997960	WBC	0.429	DGN	AA	rs146890554	32888494	European	WBC#	17	38173637	40017384	CSF3	T	C	0.014	-0.084	0.009	4.03e-20
Step2	PSMD3	ENSG00000108344	17	39980797	39997960	WBC	0.429	DGN	AA	rs2302774	32888494	European	WBC#	17	38183090	40026837	MED24	T	G	0.382	-0.096	0.002	0
Step2	PSMD3	ENSG00000108344	17	39980797	39997960	WBC	0.429	DGN	AA	rs553814563	32888494	European	WBC#	17	38303605	40147352	CASC3	G	A	0.002	-0.136	0.025	5.87e-08
Step2	PSMD3	ENSG00000108344	17	39980797	39997960	WBC	0.429	DGN	AA	rs34223321	32888494	European	WBC#	17	rs34223321	40196136	RAPGEFL1	A	C	0.301	0.034	0.002	1.52e-48
Step 1	MED24	ENSG00000008838	17	40019097	40061215	WBC	0.531	DGN	AA	NA	27863252	European	WBC#	17	38080865	39924612	ORMDL3	G	A	0.502	0.067	0.004	2.51e-79
Step 1	MED24	ENSG00000008838	17	40019097	40061215	WBC	0.531	DGN	AA	NA	27486782	European	WBC#	17	38153554	39997301	PSMD3	G	A	0.454	-0.14	0.022	4.97e-10
Step 1	MED24	ENSG00000008838	17	40019097	40061215	WBC	0.531	DGN	AA	rs11078928	26805783	EA+AA	WBC#	17	38064469	39908216	GSDMB	C	T	0.401	-0.047	0.005	3.53e-24
Step 1	MED24	ENSG00000008838	17	40019097	40061215	WBC	0.531	DGN	AA	rs11078928	26805783	EA	WBC#	17	38064469	39908216	GSDMB	C	T	0.447	-0.052	0.005	5.09e-26
Step 1	MED24	ENSG00000008838	17	40019097	40061215	WBC	0.531	DGN	AA	rs11557467	26805783	EA+AA	WBC#	17	38028634	39872381	ZPBP2	T	G	0.475	-0.04	0.005	2.98e-18
Step 1	MED24	ENSG00000008838	17	40019097	40061215	WBC	0.531	DGN	AA	rs11557467	26805783	EA	WBC#	17	38028634	39872381	ZPBP2	T	G	0.494	-0.049	0.005	2.76e-21
Step 1	MED24	ENSG00000008838	17	40019097	40061215	WBC	0.531	DGN	AA	rs12600856	27863252	European	WBC#	17	38163295	40007042	NA	C	T	0.39	0.106	0.004	8.03e-185
Step 1	MED24	ENSG00000008838	17	40019097	40061215	WBC	0.531	DGN	AA	rs146890554	27863252	European	WBC#	17	38173637	40017384	CSF3	T	C	0.014	-0.108	0.016	1.01e-11
Step 1	MED24	ENSG00000008838	17	40019097	40061215	WBC	0.531	DGN	AA	rs17609240	26805783	EA+AA	WBC#	17	38110689	39954436	LRRC3C-GSDMA	G	T	0.651	0.059	0.004	1.45e-40
Step 1	MED24	ENSG00000008838	17	40019097	40061215	WBC	0.531	DGN	AA	rs17609240	26805783	EA	WBC#	17	38110689	39954436	LRRC3C-GSDMA	G	T	0.629	0.067	0.005	1.31e-43
Step 1	MED24	ENSG00000008838	17	40019097	40061215	WBC	0.531	DGN	AA	rs2227336	27919910	HISP	WBC#	17	38174855	40018602	CSF3-MED24	T	G	0.663	0.026	0.004	8.8e-11
Step 1	MED24	ENSG00000008838	17	40019097	40061215	WBC	0.531	DGN	AA	rs2241244	27486782	EU+AA	WBC#	17	38153554	39997301	PSMD3	G	C	0.432	-0.091	0.019	1.62e-06
Step 1	MED24	ENSG00000008838	17	40019097	40061215	WBC	0.531	DGN	AA	rs2241244	27486782	European	WBC#	17	38153554	39997301	PSMD3	G	C	0.454	-0.14	0.022	4.97e-10
Step 1	MED24	ENSG00000008838	17	40019097	40061215	WBC	0.531	DGN	AA	rs2290400	26805783	EA+AA	WBC#	17	38066240	39909987	GSDMB	C	T	0.443	-0.033	0.006	6.32e-09
Step 1	MED24	ENSG00000008838	17	40019097	40061215	WBC	0.531	DGN	AA	rs2290400	26805783	EA	WBC#	17	38066240	39909987	GSDMB	C	T	0.528	-0.039	0.006	6.76e-10
Step 1	MED24	ENSG00000008838	17	40019097	40061215	WBC	0.531	DGN	AA	rs2302777	27486782	EU+AA	WBC#	17	38179492	40023239	MED24	A	G	0.336	-0.087	0.013	9.74e-11
Step 1	MED24	ENSG00000008838	17	40019097	40061215	WBC	0.531	DGN	AA	rs2302777	27486782	European	WBC#	17	38179492	40023239	MED24	A	G	0.369	-0.089	0.014	1.48e-10
Step 1	MED24	ENSG00000008838	17	40019097	40061215	WBC	0.531	DGN	AA	rs2305479	26805783	EA+AA	WBC#	17	38062217	39905964	GSDMB	T	C	0.441	-0.042	0.005	1.37e-20
Step 1	MED24	ENSG00000008838	17	40019097	40061215	WBC	0.531	DGN	AA	rs2305479	26805783	EA	WBC#	17	38062217	39905964	GSDMB	T	C	0.487	-0.05	0.005	6.96e-24
Step 1	MED24	ENSG00000008838	17	40019097	40061215	WBC	0.531	DGN	AA	rs2305480	26805783	EA+AA	WBC#	17	38062196	39905943	GSDMB	A	G	0.4	-0.047	0.005	5.77e-21
Step 1	MED24	ENSG00000008838	17	40019097	40061215	WBC	0.531	DGN	AA	rs2305480	26805783	EA	WBC#	17	38062196	39905943	GSDMB	A	G	0.447	-0.052	0.005	4.03e-22
Step 1	MED24	ENSG00000008838	17	40019097	40061215	WBC	0.531	DGN	AA	rs25645	27486782	EU+AA	WBC#	17	38173143	40016890	CSF3	G	A	0.333	-0.086	0.014	2.25e-10
Step 1	MED24	ENSG00000008838	17	40019097	40061215	WBC	0.531	DGN	AA	rs25645	27486782	European	WBC#	17	38173143	40016890	CSF3	G	A	0.365	-0.087	0.014	3.51e-10
Step 1	MED24	ENSG00000008838	17	40019097	40061215	WBC	0.531	DGN	AA	rs2872507	26805783	EA+AA	WBC#	17	38040763	39884510	ZPBP2-GSDMB	A	G	0.423	-0.041	0.004	1.98e-20
Step 1	MED24	ENSG00000008838	17	40019097	40061215	WBC	0.531	DGN	AA	rs2872507	26805783	EA	WBC#	17	38040763	39884510	ZPBP2-GSDMB	A	G	0.453	-0.049	0.005	2.71e-23
Step 1	MED24	ENSG00000008838	17	40019097	40061215	WBC	0.531	DGN	AA	rs3087852	27486782	EU+AA	WBC#	17	38137364	39981111	PSMD3	G	A	0.454	-0.079	0.015	1.7e-07
Step 1	MED24	ENSG00000008838	17	40019097	40061215	WBC	0.531	DGN	AA	rs3087852	27486782	European	WBC#	17	38137364	39981111	PSMD3	G	A	0.454	-0.079	0.015	1.7e-07
Step 1	MED24	ENSG00000008838	17	40019097	40061215	WBC	0.531	DGN	AA	rs386589754;rs3935280	27486782	European	WBC#	17	38189055	40032802	MED24	A	G	0.399	-0.189	0.034	2.05e-08
Step 1	MED24	ENSG00000008838	17	40019097	40061215	WBC	0.531	DGN	AA	rs3894194	27486782	EU+AA	WBC#	17	38121993	39965740	GSDMA	G	A	0.465	0.079	0.015	8.07e-08
Step 1	MED24	ENSG00000008838	17	40019097	40061215	WBC	0.531	DGN	AA	rs3894194	27486782	European	WBC#	17	38121993	39965740	GSDMA	G	A	0.465	0.079	0.015	8.07e-08
Step 1	MED24	ENSG00000008838	17	40019097	40061215	WBC	0.531	DGN	AA	rs4247366	27486782	EU+AA	WBC#	17	38179374	40023121	MED24	G	A	0.067	0.111	0.025	1.38e-05
Step 1	MED24	ENSG00000008838	17	40019097	40061215	WBC	0.531	DGN	AA	rs4247366	27486782	European	WBC#	17	38179374	40023121	MED24	G	A	0.074	0.111	0.026	1.79e-05
Step 1	MED24	ENSG00000008838	17	40019097	40061215	WBC	0.531	DGN	AA	rs4794822	24777453	EA	WBC#	17	38156712	40000459	PSMD3	T	C	0.388	0.011	0.001	5.09e-30
Step 1	MED24	ENSG00000008838	17	40019097	40061215	WBC	0.531	DGN	AA	rs4794822	25096241	AfricanAmerican	WBC#	17	38156712	40000459	PSMD3	C	T	0.325	0.013	0.004	0.0433
Step 1	MED24	ENSG00000008838	17	40019097	40061215	WBC	0.531	DGN	AA	rs4794822	25096241	EA	WBC#	17	38156712	40000459	PSMD3	C	T	0.586	0.028	0.003	3.23e-23
Step 1	MED24	ENSG00000008838	17	40019097	40061215	WBC	0.531	DGN	AA	rs4794822	25096241	Japanese	WBC#	17	38156712	40000459	PSMD3	C	T	0.481	0.019	0.003	2.9e-12
Step 1	MED24	ENSG00000008838	17	40019097	40061215	WBC	0.531	DGN	AA	rs4794822	27399967	EA+AA+HL	WBC#	17	38156712	40000459	exm-rs4794822	NA	NA	0.363	NA	NA	8.01e-43
Step 1	MED24	ENSG00000008838	17	40019097	40061215	WBC	0.531	DGN	AA	rs4794822	26805783	AfricanAmerican	WBC#	17	38156712	40000459	PSMD3-CSF3	T	C	0.32	0.059	0.01	1.31e-08
Step 1	MED24	ENSG00000008838	17	40019097	40061215	WBC	0.531	DGN	AA	rs4794822	26805783	EA+AA	WBC#	17	38156712	40000459	PSMD3-CSF3	T	C	0.373	0.086	0.004	2.94e-85
Step 1	MED24	ENSG00000008838	17	40019097	40061215	WBC	0.531	DGN	AA	rs4794822	26805783	EA	WBC#	17	38156712	40000459	PSMD3-CSF3	T	C	0.385	0.086	0.005	9.53e-71
Step 1	MED24	ENSG00000008838	17	40019097	40061215	WBC	0.531	DGN	AA	rs55771023	29403010	Japanese	WBC#	17	38165298	40009045	PSMD3;CSF3	A	C	0.516	0.07	0.004	9.43e-62
Step 1	MED24	ENSG00000008838	17	40019097	40061215	WBC	0.531	DGN	AA	rs56030650	27486782	EU+AA	WBC#	17	38131187	39974934	GSDMA	C	A	0.474	0.094	0.013	1.96e-12
Step 1	MED24	ENSG00000008838	17	40019097	40061215	WBC	0.531	DGN	AA	rs56030650	27486782	European	WBC#	17	38131187	39974934	GSDMA	C	A	0.474	0.094	0.013	1.96e-12
Step 1	MED24	ENSG00000008838	17	40019097	40061215	WBC	0.531	DGN	AA	rs56030650	26805783	EA+AA	WBC#	17	38131187	39974934	GSDMA	A	C	0.445	0.076	0.004	3.09e-75
Step 1	MED24	ENSG00000008838	17	40019097	40061215	WBC	0.531	DGN	AA	rs56030650	26805783	EA	WBC#	17	38131187	39974934	GSDMA	A	C	0.465	0.078	0.005	1.83e-64
Step 1	MED24	ENSG00000008838	17	40019097	40061215	WBC	0.531	DGN	AA	rs7212938	26805783	EA+AA	WBC#	17	38122680	39966427	GSDMA	T	G	0.552	-0.056	0.005	2.26e-26
Step 1	MED24	ENSG00000008838	17	40019097	40061215	WBC	0.531	DGN	AA	rs7212938	26805783	EA	WBC#	17	38122680	39966427	GSDMA	T	G	0.509	-0.059	0.006	1.16e-23
Step 1	MED24	ENSG00000008838	17	40019097	40061215	WBC	0.531	DGN	AA	rs7212944	27486782	EU+AA	WBC#	17	38122686	39966433	GSDMA	G	A	0.325	-0.081	0.014	1.71e-08
Step 1	MED24	ENSG00000008838	17	40019097	40061215	WBC	0.531	DGN	AA	rs7212944	27486782	European	WBC#	17	38122686	39966433	GSDMA	G	A	0.325	-0.081	0.014	1.71e-08
Step 1	MED24	ENSG00000008838	17	40019097	40061215	WBC	0.531	DGN	AA	rs7212944	26805783	EA+AA	WBC#	17	38122686	39966433	GSDMA	A	G	0.289	-0.041	0.007	1.5e-08
Step 1	MED24	ENSG00000008838	17	40019097	40061215	WBC	0.531	DGN	AA	rs7212944	26805783	EA	WBC#	17	38122686	39966433	GSDMA	A	G	0.416	-0.051	0.008	1.98e-10
Step 1	MED24	ENSG00000008838	17	40019097	40061215	WBC	0.531	DGN	AA	rs7216389	26805783	EA+AA	WBC#	17	38069949	39913696	GSDMB	T	C	0.547	0.041	0.005	1.65e-19
Step 1	MED24	ENSG00000008838	17	40019097	40061215	WBC	0.531	DGN	AA	rs7216389	26805783	EA	WBC#	17	38069949	39913696	GSDMB	T	C	0.504	0.049	0.005	2.45e-23
Step 1	MED24	ENSG00000008838	17	40019097	40061215	WBC	0.531	DGN	AA	rs8067378	26805783	EA+AA	WBC#	17	38051348	39895095	ZPBP2-GSDMB	G	A	0.499	-0.042	0.004	1.91e-21
Step 1	MED24	ENSG00000008838	17	40019097	40061215	WBC	0.531	DGN	AA	rs8067378	26805783	EA	WBC#	17	38051348	39895095	ZPBP2-GSDMB	G	A	0.498	-0.047	0.005	5.45e-21
Step 1	MED24	ENSG00000008838	17	40019097	40061215	WBC	0.531	DGN	AA	rs907092	26805783	EA+AA	WBC#	17	37922259	39766006	IKZF3	A	G	0.411	-0.041	0.005	1.53e-16
Step 1	MED24	ENSG00000008838	17	40019097	40061215	WBC	0.531	DGN	AA	rs907092	26805783	EA	WBC#	17	37922259	39766006	IKZF3	A	G	0.456	-0.044	0.005	1.03e-16
Step 1	MED24	ENSG00000008838	17	40019097	40061215	WBC	0.531	DGN	AA	rs9303277	26805783	EA+AA	WBC#	17	37976469	39820216	IKZF3	T	C	0.509	-0.04	0.004	1.69e-19
Step 1	MED24	ENSG00000008838	17	40019097	40061215	WBC	0.531	DGN	AA	rs9303277	26805783	EA	WBC#	17	37976469	39820216	IKZF3	T	C	0.5	-0.043	0.005	2.59e-18
Step 1	MED24	ENSG00000008838	17	40019097	40061215	WBC	0.531	DGN	AA	rs9914973	27486782	EU+AA	WBC#	17	38122708	39966455	GSDMA	T	C	0.324	-0.107	0.024	7.11e-06
Step 1	MED24	ENSG00000008838	17	40019097	40061215	WBC	0.531	DGN	AA	rs9914973	27486782	European	WBC#	17	38122708	39966455	GSDMA	T	C	0.324	-0.107	0.024	7.11e-06
Step 1	MED24	ENSG00000008838	17	40019097	40061215	WBC	0.531	DGN	AA	rs9915252	27486782	EU+AA	WBC#	17	38145088	39988835	PSMD3	C	G	0.432	-0.095	0.019	4.78e-07
Step 1	MED24	ENSG00000008838	17	40019097	40061215	WBC	0.531	DGN	AA	rs9915252	27486782	European	WBC#	17	38145088	39988835	PSMD3	C	G	0.454	-0.145	0.022	9.56e-11
Step 2	TTC39C	ENSG00000168234	18	23992773	24135610	WBC	0.971	DGN	AA	rs60839038	32888494	European	WBC#	18	20711927	23131963	CABLES1	C	A	0.474	-0.016	0.002	4.5e-13
Step 2	TTC39C	ENSG00000168234	18	23992773	24135610	WBC	0.971	DGN	AA	rs303753	32888494	European	WBC#	18	21074922	23494958		A	G	0.346	-0.021	0.002	4.72e-20
Step 2	TTC39C	ENSG00000168234	18	23992773	24135610	WBC	0.971	DGN	AA	rs4239439	32888494	European	WBC#	18	21620065	24040101	TTC39C	A	G	0.797	-0.019	0.003	1e-12
Step 2	TTC39C	ENSG00000168234	18	23992773	24135610	WBC	0.971	DGN	AA	rs76786413	32888494	European	WBC#	18	21857742	24277778	OSBPL1A	T	A	0.037	-0.039	0.006	4.55e-12
Step 1	NPRL3	ILMN_2369580.ENSG00000103148	16	84271	138860	HGB	0.257	MESA	AA	rs11863726	23103231	AfricanAmerican	HGB	16	230578	180579	HBQ1	G	A	0.271	-0.13	0.02	8.9e-11
Step 1	NPRL3	ILMN_2369580.ENSG00000103148	16	84271	138860	HGB	0.257	MESA	AA	rs13335497	23103231	AfricanAmerican	HGB	16	310005	260006	ITFG3	A	G	0.069	-0.344	0.036	1.8e-21
Step 1	NPRL3	ILMN_2369580.ENSG00000103148	16	84271	138860	HGB	0.257	MESA	AA	rs13335629	23446634	AfricanAmerican	HGB	16	310380	260381	ITFG3;LUCL7;NPRL3;POLR3K;RPL2B;MPG	A	G	0.12	-0.19	0.019	2.63e-23
Step 1	NPRL3	ILMN_2369580.ENSG00000103148	16	84271	138860	HGB	0.257	MESA	AA	rs2562181	28017375	AfricanAmerican	HGB	16	141659	91661	NPRL3;MPG	T	C	0.32	-0.098	0.013	5.05e-14
Step 1	NPRL3	ILMN_2369580.ENSG00000103148	16	84271	138860	HGB	0.257	MESA	AA	rs530159671	27863252	European	HGB	16	250184	200185	LUC7L	A	G	0.002	-0.307	0.049	4.28e-10
Step 1	NPRL3	ILMN_2369580.ENSG00000103148	16	84271	138860	HGB	0.257	MESA	AA	rs7203560	23263863	AfricanAmerican	HGB	16	184390	134391	16p13.3	G	T	0.061	-0.199	0.036	2.23e-08
Step 1	NPRL3	ILMN_2369580.ENSG00000103148	16	84271	138860	HGB	0.257	MESA	AA	rs8055546	27863252	European	HGB	16	249022	199023	LUC7L	T	C	0.068	0.048	0.007	6.93e-12
Step 1	NPRL3	ILMN_2369580.ENSG00000103148	16	84271	138860	HGB	0.257	MESA	AA	rs9924561	23103231	AfricanAmerican	HGB	16	314780	264781	ITFG3	G	T	0.066	-0.389	0.038	6.6e-24
Step 1	FAM234A	ILMN_1810055.ENSG00000167930	16	234546	268971	HGB	0.0868	MESA	AA	rs11863726	23103231	AfricanAmerican	HGB	16	230578	180579	HBQ1	G	A	0.271	-0.13	0.02	8.9e-11
Step 1	FAM234A	ILMN_1810055.ENSG00000167930	16	234546	268971	HGB	0.0868	MESA	AA	rs13335497	23103231	AfricanAmerican	HGB	16	310005	260006	ITFG3	A	G	0.069	-0.344	0.036	1.8e-21
Step 1	FAM234A	ILMN_1810055.ENSG00000167930	16	234546	268971	HGB	0.0868	MESA	AA	rs13335629	23446634	AfricanAmerican	HGB	16	310380	260381	ITFG3;LUCL7;NPRL3;POLR3K;RPL2B;MPG	A	G	0.12	-0.19	0.019	2.63e-23
Step 1	FAM234A	ILMN_1810055.ENSG00000167930	16	234546	268971	HGB	0.0868	MESA	AA	rs2562181	28017375	AfricanAmerican	HGB	16	141659	91661	NPRL3;MPG	T	C	0.32	-0.098	0.013	5.05e-14
Step 1	FAM234A	ILMN_1810055.ENSG00000167930	16	234546	268971	HGB	0.0868	MESA	AA	rs530159671	27863252	European	HGB	16	250184	200185	LUC7L	A	G	0.002	-0.307	0.049	4.28e-10
Step 1	FAM234A	ILMN_1810055.ENSG00000167930	16	234546	268971	HGB	0.0868	MESA	AA	rs7203560	23263863	AfricanAmerican	HGB	16	184390	134391	16p13.3	G	T	0.061	-0.199	0.036	2.23e-08
Step 1	FAM234A	ILMN_1810055.ENSG00000167930	16	234546	268971	HGB	0.0868	MESA	AA	rs8055546	27863252	European	HGB	16	249022	199023	LUC7L	T	C	0.068	0.048	0.007	6.93e-12
Step 1	FAM234A	ILMN_1810055.ENSG00000167930	16	234546	268971	HGB	0.0868	MESA	AA	rs9924561	23103231	AfricanAmerican	HGB	16	314780	264781	ITFG3	G	T	0.066	-0.389	0.038	6.6e-24
Step 1	RAB11FIP3	ILMN_1708328.ENSG00000090565	16	425619	523011	HGB	0.527	MESA	AA	rs11863726	23103231	AfricanAmerican	HGB	16	230578	180579	HBQ1	G	A	0.271	-0.13	0.02	8.9e-11
Step 1	RAB11FIP3	ILMN_1708328.ENSG00000090565	16	425619	523011	HGB	0.527	MESA	AA	rs13335497	23103231	AfricanAmerican	HGB	16	310005	260006	ITFG3	A	G	0.069	-0.344	0.036	1.8e-21
Step 1	RAB11FIP3	ILMN_1708328.ENSG00000090565	16	425619	523011	HGB	0.527	MESA	AA	rs13335629	23446634	AfricanAmerican	HGB	16	310380	260381	ITFG3;LUCL7;NPRL3;POLR3K;RPL2B;MPG	A	G	0.12	-0.19	0.019	2.63e-23
Step 1	RAB11FIP3	ILMN_1708328.ENSG00000090565	16	425619	523011	HGB	0.527	MESA	AA	rs2562181	28017375	AfricanAmerican	HGB	16	141659	91661	NPRL3;MPG	T	C	0.32	-0.098	0.013	5.05e-14
Step 1	RAB11FIP3	ILMN_1708328.ENSG00000090565	16	425619	523011	HGB	0.527	MESA	AA	rs530159671	27863252	European	HGB	16	250184	200185	LUC7L	A	G	0.002	-0.307	0.049	4.28e-10
Step 1	RAB11FIP3	ILMN_1708328.ENSG00000090565	16	425619	523011	HGB	0.527	MESA	AA	rs7203560	23263863	AfricanAmerican	HGB	16	184390	134391	16p13.3	G	T	0.061	-0.199	0.036	2.23e-08
Step 1	RAB11FIP3	ILMN_1708328.ENSG00000090565	16	425619	523011	HGB	0.527	MESA	AA	rs8055546	27863252	European	HGB	16	249022	199023	LUC7L	T	C	0.068	0.048	0.007	6.93e-12
Step 1	RAB11FIP3	ILMN_1708328.ENSG00000090565	16	425619	523011	HGB	0.527	MESA	AA	rs9924561	23103231	AfricanAmerican	HGB	16	314780	264781	ITFG3	G	T	0.066	-0.389	0.038	6.6e-24
Step 1	ANTKMT	ILMN_1773780.ENSG00000103254	16	720581	722601	HGB	0.2	MESA	AA	rs11863726	23103231	AfricanAmerican	HGB	16	230578	180579	HBQ1	G	A	0.271	-0.13	0.02	8.9e-11
Step 1	ANTKMT	ILMN_1773780.ENSG00000103254	16	720581	722601	HGB	0.2	MESA	AA	rs13335497	23103231	AfricanAmerican	HGB	16	310005	260006	ITFG3	A	G	0.069	-0.344	0.036	1.8e-21
Step 1	ANTKMT	ILMN_1773780.ENSG00000103254	16	720581	722601	HGB	0.2	MESA	AA	rs13335629	23446634	AfricanAmerican	HGB	16	310380	260381	ITFG3;LUCL7;NPRL3;POLR3K;RPL2B;MPG	A	G	0.12	-0.19	0.019	2.63e-23
Step 1	ANTKMT	ILMN_1773780.ENSG00000103254	16	720581	722601	HGB	0.2	MESA	AA	rs2562181	28017375	AfricanAmerican	HGB	16	141659	91661	NPRL3;MPG	T	C	0.32	-0.098	0.013	5.05e-14
Step 1	ANTKMT	ILMN_1773780.ENSG00000103254	16	720581	722601	HGB	0.2	MESA	AA	rs530159671	27863252	European	HGB	16	250184	200185	LUC7L	A	G	0.002	-0.307	0.049	4.28e-10
Step 1	ANTKMT	ILMN_1773780.ENSG00000103254	16	720581	722601	HGB	0.2	MESA	AA	rs7203560	23263863	AfricanAmerican	HGB	16	184390	134391	16p13.3	G	T	0.061	-0.199	0.036	2.23e-08
Step 1	ANTKMT	ILMN_1773780.ENSG00000103254	16	720581	722601	HGB	0.2	MESA	AA	rs8055546	27863252	European	HGB	16	249022	199023	LUC7L	T	C	0.068	0.048	0.007	6.93e-12
Step 1	ANTKMT	ILMN_1773780.ENSG00000103254	16	720581	722601	HGB	0.2	MESA	AA	rs9924561	23103231	AfricanAmerican	HGB	16	314780	264781	ITFG3	G	T	0.066	-0.389	0.038	6.6e-24
Step 1	CIAO3	ILMN_1813833.ENSG00000103245	16	729753	741329	HGB	0.829	MESA	AA	rs11863726	23103231	AfricanAmerican	HGB	16	230578	180579	HBQ1	G	A	0.271	-0.13	0.02	8.9e-11
Step 1	CIAO3	ILMN_1813833.ENSG00000103245	16	729753	741329	HGB	0.829	MESA	AA	rs13335497	23103231	AfricanAmerican	HGB	16	310005	260006	ITFG3	A	G	0.069	-0.344	0.036	1.8e-21
Step 1	CIAO3	ILMN_1813833.ENSG00000103245	16	729753	741329	HGB	0.829	MESA	AA	rs13335629	23446634	AfricanAmerican	HGB	16	310380	260381	ITFG3;LUCL7;NPRL3;POLR3K;RPL2B;MPG	A	G	0.12	-0.19	0.019	2.63e-23
Step 1	CIAO3	ILMN_1813833.ENSG00000103245	16	729753	741329	HGB	0.829	MESA	AA	rs2562181	28017375	AfricanAmerican	HGB	16	141659	91661	NPRL3;MPG	T	C	0.32	-0.098	0.013	5.05e-14
Step 1	CIAO3	ILMN_1813833.ENSG00000103245	16	729753	741329	HGB	0.829	MESA	AA	rs530159671	27863252	European	HGB	16	250184	200185	LUC7L	A	G	0.002	-0.307	0.049	4.28e-10
Step 1	CIAO3	ILMN_1813833.ENSG00000103245	16	729753	741329	HGB	0.829	MESA	AA	rs7203560	23263863	AfricanAmerican	HGB	16	184390	134391	16p13.3	G	T	0.061	-0.199	0.036	2.23e-08
Step 1	CIAO3	ILMN_1813833.ENSG00000103245	16	729753	741329	HGB	0.829	MESA	AA	rs8055546	27863252	European	HGB	16	249022	199023	LUC7L	T	C	0.068	0.048	0.007	6.93e-12
Step 1	CIAO3	ILMN_1813833.ENSG00000103245	16	729753	741329	HGB	0.829	MESA	AA	rs9924561	23103231	AfricanAmerican	HGB	16	314780	264781	ITFG3	G	T	0.066	-0.389	0.038	6.6e-24
Step 1	BAK1	ILMN_1805990.ENSG00000030110	6	33572547	33580293	PLT	0.524	MESA	AA	rs210134	22139419	European	PLT	6	33540209	33572432	BAK1	G	A	NA	4.957	0.396	7.11e-36
Step 1	BAK1	ILMN_1805990.ENSG00000030110	6	33572547	33580293	PLT	0.524	MESA	AA	rs210135	19820697	European	PLT	6	33540692	33572915	BAK1	A	T	0.68	5.438	0.868	3.7e-10
Step 1	BAK1	ILMN_1805990.ENSG00000030110	6	33572547	33580293	PLT	0.524	MESA	AA	rs210139	24777453	European	PLT	6	33543409	33575632	BAK1	a	c	0.61	-4.433	0.528	4.66e-17
Step 1	BAK1	ILMN_1805990.ENSG00000030110	6	33572547	33580293	PLT	0.524	MESA	AA	rs210142	27863252	European	PLT	6	33546837	33579060	BAK1	C	T	0.702	0.081	0.004	1.19e-144
Step 1	BAK1	ILMN_1805990.ENSG00000030110	6	33572547	33580293	PLT	0.524	MESA	AA	rs210143	29403010	Japanese	PLT	6	33546930	33579153	BAK1	C	T	0.782	0.055	0.005	2.44e-27
Step 1	BAK1	ILMN_1805990.ENSG00000030110	6	33572547	33580293	PLT	0.524	MESA	AA	rs210170	27346686	CombinedAncestry	PLT	6	33525680	33557903	BAK1	C	T	0.655	0.048	NA	6.23e-26
Step 1	BAK1	ILMN_1805990.ENSG00000030110	6	33572547	33580293	PLT	0.524	MESA	AA	rs399604	22139419	European	PLT	6	32975014	33007237	HLA-DOA	C	T	NA	2.346	0.365	1.3e-10
Step 1	BAK1	ILMN_1805990.ENSG00000030110	6	33572547	33580293	PLT	0.524	MESA	AA	rs449242	21153663	AfricanAmerican	PLT	6	33496714	33528937	BAK1	T	G	0.33	-0.126	0.023	6.2e-08
Step 1	BAK1	ILMN_1805990.ENSG00000030110	6	33572547	33580293	PLT	0.524	MESA	AA	rs513349	23103231	AfricanAmerican	PLT	6	33541719	33573942	BAK1	A	G	0.367	-4.907	0.778	2.9e-10
Step 1	BAK1	ILMN_1805990.ENSG00000030110	6	33572547	33580293	PLT	0.524	MESA	AA	rs5745568	20139978	Japanese	PLT	6	33548394	33580617	BAK1	T	G	0.23	0.09	0.014	6.66e-11
Step 1	BAK1	ILMN_1805990.ENSG00000030110	6	33572547	33580293	PLT	0.524	MESA	AA	rs5745582	21153663	European	PLT	6	33546498	33578721	BAK1	T	C	0.21	0.076	0.015	7.6e-07
Step 1	BAK1	ILMN_1805990.ENSG00000030110	6	33572547	33580293	PLT	0.524	MESA	AA	rs62405954	26805783	Hispanic/Latino	PLT	6	33524820	33557043	ZBTB9-BAK1	T	C	0.86	-0.239	0.037	1.1e-10
Step 1	BAK1	ILMN_1805990.ENSG00000030110	6	33572547	33580293	PLT	0.524	MESA	AA	rs75080135	27863252	European	PLT	6	33552707	33584930	GGNBP1	C	A	0.177	0.071	0.004	5.82e-101
Step 1	BAK1	ILMN_1805990.ENSG00000030110	6	33572547	33580293	PLT	0.524	MESA	AA	rs9277053	26064965	Korean	PLT	6	33006222	33038445	HLA-DOA-HLA-DPA1	A	G	0.34	5.18	1.049	7.95e-07
Step 1	BAK1	ILMN_1805990.ENSG00000030110	6	33572547	33580293	PLT	0.524	MESA	AA	rs9296095	25705162	Korean	PLT	6	33542523	33574746	BAK1	G	A	0.23	4.8	1.17	4.24e-05
Step 1	NRBF2	ILMN_3237385.ENSG00000148572	10	63133247	63155031	PLT	0.094	MESA	AA	rs10761731	22139419	European	PLT	10	65027610	63267850	JMJD1C	T	A	NA	3.849	0.378	2.02e-24
Step 1	NRBF2	ILMN_3237385.ENSG00000148572	10	63133247	63155031	PLT	0.094	MESA	AA	rs10761741	27863252	European	PLT	10	65066186	63306426	JMJD1C	T	G	0.418	0.08	0.003	3.12e-96
Step 1	NRBF2	ILMN_3237385.ENSG00000148572	10	63133247	63155031	PLT	0.094	MESA	AA	rs10822155	26805783	Hispanic/Latino	PLT	10	65071215	63311455	JMJD1C	C	A	0.71	-0.168	0.028	3.5e-09
Step 1	NRBF2	ILMN_3237385.ENSG00000148572	10	63133247	63155031	PLT	0.094	MESA	AA	rs12355784	24777453	European	PLT	10	65121565	63361805	JMJD1C	a	c	0.489	3.74	0.515	3.75e-13
Step 1	NRBF2	ILMN_3237385.ENSG00000148572	10	63133247	63155031	PLT	0.094	MESA	AA	rs1896995	29403010	Japanese	PLT	10	65365385	63605625	REEP3	T	C	0.525	0.041	0.004	4.64e-21
Step 1	NRBF2	ILMN_3237385.ENSG00000148572	10	63133247	63155031	PLT	0.094	MESA	AA	rs1935	27486782	EU + African	PLT	10	64927823	63168063	JMJD1C	G	C	0.45	0.082	0.013	2.79e-10
Step 2	ARAP2	ILMN_1767541.ENSG00000047365	4	35948221	36244509	WBC	0.29	MESA	AA	rs28530750	32888494	European	WBC#	4	36312542	36310920	DTHD1	A	G	0.043	0.058	0.005	6.78e-28
Step 2	ARAP2	ILMN_1767541.ENSG00000047365	4	35948221	36244509	WBC	0.29	MESA	AA	rs28530750	32888493	European	WBC#	4	36312542	36310920	DTHD1	A	G	0.043	0.056	0.005	1.83e-33
Step 2	ARAP2	ILMN_3244434.ENSG00000047365	4	35948221	36244509	WBC	0.347	MESA	AA	rs28530750	32888494	European	WBC#	4	36312542	36310920	DTHD1	A	G	0.043	0.058	0.005	6.78e-28
Step 2	ARAP2	ILMN_3244434.ENSG00000047365	4	35948221	36244509	WBC	0.347	MESA	AA	rs28530750	32888493	European	WBC#	4	36312542	36310920	DTHD1	A	G	0.043	0.056	0.005	1.83e-33
Step 1	JAZF1	ILMN_1682727.ENSG00000153814	7	27830573	28180743	WBC	0.891	MESA	AA	rs2158799	27863252	AfricanAmerican	WBC#	7	28277107	28237488	JAZF1-AS1	G	C	0.608	0.047	0.004	9.73e-37
Step 1	JAZF1	ILMN_1682727.ENSG00000153814	7	27830573	28180743	WBC	0.891	MESA	AA	rs56388170	27863252	AfricanAmerican	WBC#	7	28724374	28684757	CREB5	T	G	0.296	0.063	0.004	6.72e-56
Step 1	JAZF1	ILMN_1682727.ENSG00000153814	7	27830573	28180743	WBC	0.891	MESA	AA	rs57123607	29403010	Japanese	WBC#	7	28717030	28677413	CREB5	T	C	0.268	0.041	0.005	1.84e-17
Step 2	TTC39C	ILMN_1746720.ENSG00000168234	18	23992773	24135610	WBC	0.604	MESA	AA	rs60839038	32888494	European	WBC#	18	20711927	23131963	CABLES1	C	A	0.474	-0.016	0.002	4.5e-13
Step 2	TTC39C	ILMN_1746720.ENSG00000168234	18	23992773	24135610	WBC	0.604	MESA	AA	rs303753	32888494	European	WBC#	18	21074922	23494958		A	G	0.346	-0.021	0.002	4.72e-20
Step 2	TTC39C	ILMN_1746720.ENSG00000168234	18	23992773	24135610	WBC	0.604	MESA	AA	rs4239439	32888494	European	WBC#	18	21620065	24040101	TTC39C	A	G	0.797	-0.019	0.003	1e-12
Step 2	TTC39C	ILMN_1746720.ENSG00000168234	18	23992773	24135610	WBC	0.604	MESA	AA	rs76786413	32888494	European	WBC#	18	21857742	24277778	OSBPL1A	T	A	0.037	-0.039	0.006	4.55e-12
Step 1	EFNA3	ENSG00000143590	1	155078872	155087538	HCT	0.368	DGN	HL	rs4072037	27346685	EA+AA+Asians+Hispanics	HCT	1	155162067	155192276	MUC1	T	C	0.554	0.027	0.004	3.47e-11
Step 1	EFNA3	ENSG00000143590	1	155078872	155087538	HCT	0.368	DGN	HL	rs760077	27863252	European	HCT	1	155178782	155208991	MTX1	T	A	0.603	0.036	0.004	2.41e-23
Step 1	TRIM46	ENSG00000163462	1	155173787	155184971	HCT	0.868	DGN	HL	rs4072037	27346685	EA+AA+Asians+Hispanics	HCT	1	155162067	155192276	MUC1	T	C	0.554	0.027	0.004	3.47e-11
Step 1	TRIM46	ENSG00000163462	1	155173787	155184971	HCT	0.868	DGN	HL	rs760077	27863252	European	HCT	1	155178782	155208991	MTX1	T	A	0.603	0.036	0.004	2.41e-23
Step 1	THBS3	ENSG00000169231	1	155195588	155209051	HCT	0.79	DGN	HL	rs4072037	27346685	EA+AA+Asians+Hispanics	HCT	1	155162067	155192276	MUC1	T	C	0.554	0.027	0.004	3.47e-11
Step 1	THBS3	ENSG00000169231	1	155195588	155209051	HCT	0.79	DGN	HL	rs760077	27863252	European	HCT	1	155178782	155208991	MTX1	T	A	0.603	0.036	0.004	2.41e-23
Step 1	GBAP1	ENSG00000169231	1	155213821	155227422	HCT	0.245	DGN	HL	rs4072037	27346685	EA+AA+Asians+Hispanics	HCT	1	155162067	155192276	MUC1	T	C	0.554	0.027	0.004	3.47e-11
Step 1	GBAP1	ENSG00000169231	1	155213821	155227422	HCT	0.245	DGN	HL	rs760077	27863252	European	HCT	1	155178782	155208991	MTX1	T	A	0.603	0.036	0.004	2.41e-23
Step 1	ABO	ENSG00000175164	9	133250401	133275219	HCT	0.14	DGN	HL	rs10901252	27863252	European	HCT	9	136128000	133252613	RP11-430N14.4;ABO	C	G	0.065	0.056	0.007	8.02e-15
Step 1	ABO	ENSG00000175164	9	133250401	133275219	HCT	0.14	DGN	HL	rs2519796	27863252	European	HCT	9	136825333	133960211	VAV2	A	G	0.667	-0.024	0.004	2.15e-10
Step 1	ABO	ENSG00000175164	9	133250401	133275219	HCT	0.14	DGN	HL	rs495828	20139978	Japanese	HCT	9	136154867	133279294	ABP	T	G	0.28	-0.081	0.013	6.06e-10
Step 1	THBS3	ENSG00000169231	1	155195588	155209051	HGB	0.784	DGN	HL	rs116100695	28787443	European	HGB	1	155261709	155291918	PKLR	G	A	0.997	0.183	0.029	1.33e-10
Step 1	THBS3	ENSG00000169231	1	155195588	155209051	HGB	0.784	DGN	HL	rs760077	27863252	European	HGB	1	155178782	155208991	MTX1	T	A	0.603	0.032	0.004	5.89e-19
Step 1	ABO	ENSG00000175164	9	133250401	133275219	HGB	0.892	DGN	HL	rs10901252	27863252	European	HGB	9	136128000	133252613	RP11-430N14.4;ABO	C	G	0.065	0.076	0.007	2.23e-25
Step 1	ABO	ENSG00000175164	9	133250401	133275219	HGB	0.892	DGN	HL	rs2519796	27863252	European	HGB	9	136825333	133960211	VAV2	A	G	0.667	-0.024	0.004	3.61e-10
Step 1	ABO	ENSG00000175164	9	133250401	133275219	HGB	0.892	DGN	HL	rs495828	20139978	Japanese	HGB	9	136154867	133279294	ABO	T	G	0.28	-0.089	0.013	1.18e-11
Step 1	ABO	ENSG00000175164	9	133250401	133275219	HGB	0.892	DGN	HL	rs7853989	23222517	European	HGB	9	136131592	133256205	ABO	NA	NA	NA	NA	NA	1.1e-17
Step 1	LDLRAP1	ENSG00000157978	1	25543580	25568886	PLT	0.226	MESA	HL	rs111941366	27863252	European	PLT	1	25736369	25409878	RHCE	T	C	0.45	-0.047	0.003	6.44e-32
Step 1	LDLRAP1	ENSG00000157978	1	25543580	25568886	PLT	0.226	MESA	HL	rs12096438	27863252	European	PLT	1	25889422	25562931	LDLRAP1	T	C	0.533	-0.028	0.003	6.7e-10
Step 1	LDLRAP1	ENSG00000157978	1	25543580	25568886	PLT	0.226	MESA	HL	rs3091242	27346686	CombinedAncestry	PLT	1	25674785	25348294	TMEM50A	T	C	0.5	-0.02	NA	1.03e-05
Step 2	BAK1	ENSG00000030110	6	33572547	33580293	PLT	0.305	MESA	HL	rs511515	32888494	European	PLT	6	33541507	33573730	BAK1	G	A	0.701	0.108	0.002	0
Step 2	BAK1	ENSG00000030110	6	33572547	33580293	PLT	0.305	MESA	HL	rs5745582	32888494	European	PLT	6	33546498	33578721	BAK1	T	C	0.18	0.108	0.003	0
Step 2	BAK1	ENSG00000030110	6	33572547	33580293	PLT	0.305	MESA	HL	rs4713669	32888494	European	PLT	6	33697552	33729775	IP6K3	G	A	0.413	0.057	0.002	2.05e-154
Step 2	BAK1	ENSG00000030110	6	33572547	33580293	PLT	0.305	MESA	HL	6:34193522_C_T	32888494	European	PLT	6	34161299	34193522	KRT18P9	T	C	0.128	-0.027	0.003	9.6e-18
Step 1	MED24	ENSG00000008838	17	40019097	40061215	WBC	0.697	MESA	HL	NA	27863252	European	WBC#	17	38080865	39924612	ORMDL3	G	A	0.502	0.067	0.004	2.51e-79
Step 1	MED24	ENSG00000008838	17	40019097	40061215	WBC	0.697	MESA	HL	NA	27486782	European	WBC#	17	38153554	39997301	PSMD3	G	A	0.454	-0.14	0.022	4.97e-10
Step 1	MED24	ENSG00000008838	17	40019097	40061215	WBC	0.697	MESA	HL	rs11078928	26805783	EA+AA	WBC#	17	38064469	39908216	GSDMB	C	T	0.401	-0.047	0.005	3.53e-24
Step 1	MED24	ENSG00000008838	17	40019097	40061215	WBC	0.697	MESA	HL	rs11078928	26805783	EA	WBC#	17	38064469	39908216	GSDMB	C	T	0.447	-0.052	0.005	5.09e-26
Step 1	MED24	ENSG00000008838	17	40019097	40061215	WBC	0.697	MESA	HL	rs11557467	26805783	EA+AA	WBC#	17	38028634	39872381	ZPBP2	T	G	0.475	-0.04	0.005	2.98e-18
Step 1	MED24	ENSG00000008838	17	40019097	40061215	WBC	0.697	MESA	HL	rs11557467	26805783	EA	WBC#	17	38028634	39872381	ZPBP2	T	G	0.494	-0.049	0.005	2.76e-21
Step 1	MED24	ENSG00000008838	17	40019097	40061215	WBC	0.697	MESA	HL	rs12600856	27863252	European	WBC#	17	38163295	40007042	NA	C	T	0.39	0.106	0.004	8.03e-185
Step 1	MED24	ENSG00000008838	17	40019097	40061215	WBC	0.697	MESA	HL	rs146890554	27863252	European	WBC#	17	38173637	40017384	CSF3	T	C	0.014	-0.108	0.016	1.01e-11
Step 1	MED24	ENSG00000008838	17	40019097	40061215	WBC	0.697	MESA	HL	rs17609240	26805783	EA+AA	WBC#	17	38110689	39954436	LRRC3C-GSDMA	G	T	0.651	0.059	0.004	1.45e-40
Step 1	MED24	ENSG00000008838	17	40019097	40061215	WBC	0.697	MESA	HL	rs17609240	26805783	EA	WBC#	17	38110689	39954436	LRRC3C-GSDMA	G	T	0.629	0.067	0.005	1.31e-43
Step 1	MED24	ENSG00000008838	17	40019097	40061215	WBC	0.697	MESA	HL	rs2227336	27919910	HISP	WBC#	17	38174855	40018602	CSF3-MED24	T	G	0.663	0.026	0.004	8.8e-11
Step 1	MED24	ENSG00000008838	17	40019097	40061215	WBC	0.697	MESA	HL	rs2241244	27486782	EU+AA	WBC#	17	38153554	39997301	PSMD3	G	C	0.432	-0.091	0.019	1.62e-06
Step 1	MED24	ENSG00000008838	17	40019097	40061215	WBC	0.697	MESA	HL	rs2241244	27486782	European	WBC#	17	38153554	39997301	PSMD3	G	C	0.454	-0.14	0.022	4.97e-10
Step 1	MED24	ENSG00000008838	17	40019097	40061215	WBC	0.697	MESA	HL	rs2290400	26805783	EA+AA	WBC#	17	38066240	39909987	GSDMB	C	T	0.443	-0.033	0.006	6.32e-09
Step 1	MED24	ENSG00000008838	17	40019097	40061215	WBC	0.697	MESA	HL	rs2290400	26805783	EA	WBC#	17	38066240	39909987	GSDMB	C	T	0.528	-0.039	0.006	6.76e-10
Step 1	MED24	ENSG00000008838	17	40019097	40061215	WBC	0.697	MESA	HL	rs2302777	27486782	EU+AA	WBC#	17	38179492	40023239	MED24	A	G	0.336	-0.087	0.013	9.74e-11
Step 1	MED24	ENSG00000008838	17	40019097	40061215	WBC	0.697	MESA	HL	rs2302777	27486782	European	WBC#	17	38179492	40023239	MED24	A	G	0.369	-0.089	0.014	1.48e-10
Step 1	MED24	ENSG00000008838	17	40019097	40061215	WBC	0.697	MESA	HL	rs2305479	26805783	EA+AA	WBC#	17	38062217	39905964	GSDMB	T	C	0.441	-0.042	0.005	1.37e-20
Step 1	MED24	ENSG00000008838	17	40019097	40061215	WBC	0.697	MESA	HL	rs2305479	26805783	EA	WBC#	17	38062217	39905964	GSDMB	T	C	0.487	-0.05	0.005	6.96e-24
Step 1	MED24	ENSG00000008838	17	40019097	40061215	WBC	0.697	MESA	HL	rs2305480	26805783	EA+AA	WBC#	17	38062196	39905943	GSDMB	A	G	0.4	-0.047	0.005	5.77e-21
Step 1	MED24	ENSG00000008838	17	40019097	40061215	WBC	0.697	MESA	HL	rs2305480	26805783	EA	WBC#	17	38062196	39905943	GSDMB	A	G	0.447	-0.052	0.005	4.03e-22
Step 1	MED24	ENSG00000008838	17	40019097	40061215	WBC	0.697	MESA	HL	rs25645	27486782	EU+AA	WBC#	17	38173143	40016890	CSF3	G	A	0.333	-0.086	0.014	2.25e-10
Step 1	MED24	ENSG00000008838	17	40019097	40061215	WBC	0.697	MESA	HL	rs25645	27486782	European	WBC#	17	38173143	40016890	CSF3	G	A	0.365	-0.087	0.014	3.51e-10
Step 1	MED24	ENSG00000008838	17	40019097	40061215	WBC	0.697	MESA	HL	rs2872507	26805783	EA+AA	WBC#	17	38040763	39884510	ZPBP2-GSDMB	A	G	0.423	-0.041	0.004	1.98e-20
Step 1	MED24	ENSG00000008838	17	40019097	40061215	WBC	0.697	MESA	HL	rs2872507	26805783	EA	WBC#	17	38040763	39884510	ZPBP2-GSDMB	A	G	0.453	-0.049	0.005	2.71e-23
Step 1	MED24	ENSG00000008838	17	40019097	40061215	WBC	0.697	MESA	HL	rs3087852	27486782	EU+AA	WBC#	17	38137364	39981111	PSMD3	G	A	0.454	-0.079	0.015	1.7e-07
Step 1	MED24	ENSG00000008838	17	40019097	40061215	WBC	0.697	MESA	HL	rs3087852	27486782	European	WBC#	17	38137364	39981111	PSMD3	G	A	0.454	-0.079	0.015	1.7e-07
Step 1	MED24	ENSG00000008838	17	40019097	40061215	WBC	0.697	MESA	HL	rs386589754;rs3935280	27486782	European	WBC#	17	38189055	40032802	MED24	A	G	0.399	-0.189	0.034	2.05e-08
Step 1	MED24	ENSG00000008838	17	40019097	40061215	WBC	0.697	MESA	HL	rs3894194	27486782	EU+AA	WBC#	17	38121993	39965740	GSDMA	G	A	0.465	0.079	0.015	8.07e-08
Step 1	MED24	ENSG00000008838	17	40019097	40061215	WBC	0.697	MESA	HL	rs3894194	27486782	European	WBC#	17	38121993	39965740	GSDMA	G	A	0.465	0.079	0.015	8.07e-08
Step 1	MED24	ENSG00000008838	17	40019097	40061215	WBC	0.697	MESA	HL	rs4247366	27486782	EU+AA	WBC#	17	38179374	40023121	MED24	G	A	0.067	0.111	0.025	1.38e-05
Step 1	MED24	ENSG00000008838	17	40019097	40061215	WBC	0.697	MESA	HL	rs4247366	27486782	European	WBC#	17	38179374	40023121	MED24	G	A	0.074	0.111	0.026	1.79e-05
Step 1	MED24	ENSG00000008838	17	40019097	40061215	WBC	0.697	MESA	HL	rs4794822	24777453	EA	WBC#	17	38156712	40000459	PSMD3	T	C	0.388	0.011	0.001	5.09e-30
Step 1	MED24	ENSG00000008838	17	40019097	40061215	WBC	0.697	MESA	HL	rs4794822	25096241	AfricanAmerican	WBC#	17	38156712	40000459	PSMD3	C	T	0.325	0.013	0.004	0.0433
Step 1	MED24	ENSG00000008838	17	40019097	40061215	WBC	0.697	MESA	HL	rs4794822	25096241	EA	WBC#	17	38156712	40000459	PSMD3	C	T	0.586	0.028	0.003	3.23e-23
Step 1	MED24	ENSG00000008838	17	40019097	40061215	WBC	0.697	MESA	HL	rs4794822	25096241	Japanese	WBC#	17	38156712	40000459	PSMD3	C	T	0.481	0.019	0.003	2.9e-12
Step 1	MED24	ENSG00000008838	17	40019097	40061215	WBC	0.697	MESA	HL	rs4794822	27399967	EA+AA+HL	WBC#	17	38156712	40000459	exm-rs4794822	NA	NA	0.363	NA	NA	8.01e-43
Step 1	MED24	ENSG00000008838	17	40019097	40061215	WBC	0.697	MESA	HL	rs4794822	26805783	AfricanAmerican	WBC#	17	38156712	40000459	PSMD3-CSF3	T	C	0.32	0.059	0.01	1.31e-08
Step 1	MED24	ENSG00000008838	17	40019097	40061215	WBC	0.697	MESA	HL	rs4794822	26805783	EA+AA	WBC#	17	38156712	40000459	PSMD3-CSF3	T	C	0.373	0.086	0.004	2.94e-85
Step 1	MED24	ENSG00000008838	17	40019097	40061215	WBC	0.697	MESA	HL	rs4794822	26805783	EA	WBC#	17	38156712	40000459	PSMD3-CSF3	T	C	0.385	0.086	0.005	9.53e-71
Step 1	MED24	ENSG00000008838	17	40019097	40061215	WBC	0.697	MESA	HL	rs55771023	29403010	Japanese	WBC#	17	38165298	40009045	PSMD3;CSF3	A	C	0.516	0.07	0.004	9.43e-62
Step 1	MED24	ENSG00000008838	17	40019097	40061215	WBC	0.697	MESA	HL	rs56030650	27486782	EU+AA	WBC#	17	38131187	39974934	GSDMA	C	A	0.474	0.094	0.013	1.96e-12
Step 1	MED24	ENSG00000008838	17	40019097	40061215	WBC	0.697	MESA	HL	rs56030650	27486782	EU	WBC#	17	38131187	39974934	GSDMA	C	A	0.474	0.094	0.013	1.96e-12
Step 1	MED24	ENSG00000008838	17	40019097	40061215	WBC	0.697	MESA	HL	rs56030650	26805783	EA+AA	WBC#	17	38131187	39974934	GSDMA	A	C	0.445	0.076	0.004	3.09e-75
Step 1	MED24	ENSG00000008838	17	40019097	40061215	WBC	0.697	MESA	HL	rs56030650	26805783	EA	WBC#	17	38131187	39974934	GSDMA	A	C	0.465	0.078	0.005	1.83e-64
Step 1	MED24	ENSG00000008838	17	40019097	40061215	WBC	0.697	MESA	HL	rs7212938	26805783	EA+AA	WBC#	17	38122680	39966427	GSDMA	T	G	0.552	-0.056	0.005	2.26e-26
Step 1	MED24	ENSG00000008838	17	40019097	40061215	WBC	0.697	MESA	HL	rs7212938	26805783	EA	WBC#	17	38122680	39966427	GSDMA	T	G	0.509	-0.059	0.006	1.16e-23
Step 1	MED24	ENSG00000008838	17	40019097	40061215	WBC	0.697	MESA	HL	rs7212944	27486782	EU+AA	WBC#	17	38122686	39966433	GSDMA	G	A	0.325	-0.081	0.014	1.71e-08
Step 1	MED24	ENSG00000008838	17	40019097	40061215	WBC	0.697	MESA	HL	rs7212944	27486782	EU	WBC#	17	38122686	39966433	GSDMA	G	A	0.325	-0.081	0.014	1.71e-08
Step 1	MED24	ENSG00000008838	17	40019097	40061215	WBC	0.697	MESA	HL	rs7212944	26805783	EA+AA	WBC#	17	38122686	39966433	GSDMA	A	G	0.289	-0.041	0.007	1.5e-08
Step 1	MED24	ENSG00000008838	17	40019097	40061215	WBC	0.697	MESA	HL	rs7212944	26805783	EA	WBC#	17	38122686	39966433	GSDMA	A	G	0.416	-0.051	0.008	1.98e-10
Step 1	MED24	ENSG00000008838	17	40019097	40061215	WBC	0.697	MESA	HL	rs7216389	26805783	EA+AA	WBC#	17	38069949	39913696	GSDMB	T	C	0.547	0.041	0.005	1.65e-19
Step 1	MED24	ENSG00000008838	17	40019097	40061215	WBC	0.697	MESA	HL	rs7216389	26805783	EA	WBC#	17	38069949	39913696	GSDMB	T	C	0.504	0.049	0.005	2.45e-23
Step 1	MED24	ENSG00000008838	17	40019097	40061215	WBC	0.697	MESA	HL	rs8067378	26805783	EA+AA	WBC#	17	38051348	39895095	ZPBP2-GSDMB	G	A	0.499	-0.042	0.004	1.91e-21
Step 1	MED24	ENSG00000008838	17	40019097	40061215	WBC	0.697	MESA	HL	rs8067378	26805783	EA	WBC#	17	38051348	39895095	ZPBP2-GSDMB	G	A	0.498	-0.047	0.005	5.45e-21
Step 1	MED24	ENSG00000008838	17	40019097	40061215	WBC	0.697	MESA	HL	rs907092	26805783	EA+AA	WBC#	17	37922259	39766006	IKZF3	A	G	0.411	-0.041	0.005	1.53e-16
Step 1	MED24	ENSG00000008838	17	40019097	40061215	WBC	0.697	MESA	HL	rs907092	26805783	EA	WBC#	17	37922259	39766006	IKZF3	A	G	0.456	-0.044	0.005	1.03e-16
Step 1	MED24	ENSG00000008838	17	40019097	40061215	WBC	0.697	MESA	HL	rs9303277	26805783	EA+AA	WBC#	17	37976469	39820216	IKZF3	T	C	0.509	-0.04	0.004	1.69e-19
Step 1	MED24	ENSG00000008838	17	40019097	40061215	WBC	0.697	MESA	HL	rs9303277	26805783	EA	WBC#	17	37976469	39820216	IKZF3	T	C	0.5	-0.043	0.005	2.59e-18
Step 1	MED24	ENSG00000008838	17	40019097	40061215	WBC	0.697	MESA	HL	rs9914973	27486782	EU+AA	WBC#	17	38122708	39966455	GSDMA	T	C	0.324	-0.107	0.024	7.11e-06
Step 1	MED24	ENSG00000008838	17	40019097	40061215	WBC	0.697	MESA	HL	rs9914973	27486782	EU	WBC#	17	38122708	39966455	GSDMA	T	C	0.324	-0.107	0.024	7.11e-06
Step 1	MED24	ENSG00000008838	17	40019097	40061215	WBC	0.697	MESA	HL	rs9915252	27486782	EU+AA	WBC#	17	38145088	39988835	PSMD3	C	G	0.432	-0.095	0.019	4.78e-07
Step 1	MED24	ENSG00000008838	17	40019097	40061215	WBC	0.697	MESA	HL	rs9915252	27486782	EU	WBC#	17	38145088	39988835	PSMD3	C	G	0.454	-0.145	0.022	9.56e-11
Step 1	ADAM15	ILMN_1751500.ENSG00000143537	1	155050566	155062775	HCT	0.252	MESA	HL	rs4072037	27346685	EA+AA+Asians+Hispanics	HCT	1	155162067	155192276	MUC1	T	C	0.554	0.027	0.004	3.47e-11
Step 1	ADAM15	ILMN_1751500.ENSG00000143537	1	155050566	155062775	HCT	0.252	MESA	HL	rs760077	27863252	European	HCT	1	155178782	155208991	MTX1	T	A	0.603	0.036	0.004	2.41e-23
Step 1	THBS3	ILMN_1804663.ENSG00000169231	1	155195588	155209051	HCT	0.922	MESA	HL	rs4072037	27346685	EA+AA+Asians+Hispanics	HCT	1	155162067	155192276	MUC1	T	C	0.554	0.027	0.004	3.47e-11
Step 1	THBS3	ILMN_1804663.ENSG00000169231	1	155195588	155209051	HCT	0.922	MESA	HL	rs760077	27863252	European	HCT	1	155178782	155208991	MTX1	T	A	0.603	0.036	0.004	2.41e-23
Step 1	ADAM15	ILMN_1751500.ENSG00000143537	1	155050566	155062775	HGB	0.151	MESA	HL	rs116100695	28787443	European	HGB	1	155261709	155291918	PKLR	G	A	0.997	0.183	0.029	1.33e-10
Step 1	ADAM15	ILMN_1751500.ENSG00000143537	1	155050566	155062775	HGB	0.151	MESA	HL	rs760077	27863252	European	HGB	1	155178782	155208991	MTX1	T	A	0.603	0.032	0.004	5.89e-19
Step 1	THBS3	ILMN_1804663.ENSG00000169231	1	155195588	155209051	HGB	0.771	MESA	HL	rs116100695	28787443	European	HGB	1	155261709	155291918	PKLR	G	A	0.997	0.183	0.029	1.33e-10
Step 1	THBS3	ILMN_1804663.ENSG00000169231	1	155195588	155209051	HGB	0.771	MESA	HL	rs760077	27863252	European	HGB	1	155178782	155208991	MTX1	T	A	0.603	0.032	0.004	5.89e-19
Step 2	IL6R	ILMN_1696394.ENSG00000160712	1	154405193	154469450	PLT	0.763	MESA	HL	rs2841102	32888494	European	PLT	1	154017501	154045025	NUP210L	C	T	0.439	0.021	0.002	2.48e-23
Step 2	IL6R	ILMN_1696394.ENSG00000160712	1	154405193	154469450	PLT	0.763	MESA	HL	rs12126142	32888494	European	PLT	1	154425456	154452980	IL6R	A	G	0.409	0.014	0.002	9.96e-12
Step 1	BAK1	ILMN_1805990.ENSG00000030110	6	33572547	33580293	PLT	0.242	MESA	HL	rs210134	22139419	European	PLT	6	33540209	33572432	BAK1	G	A	NA	4.957	0.396	7.11e-36
Step 1	BAK1	ILMN_1805990.ENSG00000030110	6	33572547	33580293	PLT	0.242	MESA	HL	rs210135	19820697	European	PLT	6	33540692	33572915	BAK1	A	T	0.68	5.438	0.868	3.7e-10
Step 1	BAK1	ILMN_1805990.ENSG00000030110	6	33572547	33580293	PLT	0.242	MESA	HL	rs210139	24777453	European	PLT	6	33543409	33575632	BAK1	a	c	0.61	-4.433	0.528	4.66e-17
Step 1	BAK1	ILMN_1805990.ENSG00000030110	6	33572547	33580293	PLT	0.242	MESA	HL	rs210142	27863252	European	PLT	6	33546837	33579060	BAK1	C	T	0.702	0.081	0.004	1.19e-144
Step 1	BAK1	ILMN_1805990.ENSG00000030110	6	33572547	33580293	PLT	0.242	MESA	HL	rs210143	29403010	Japanese	PLT	6	33546930	33579153	BAK1	C	T	0.782	0.055	0.005	2.44e-27
Step 1	BAK1	ILMN_1805990.ENSG00000030110	6	33572547	33580293	PLT	0.242	MESA	HL	rs210170	27346686	CombinedAncestry	PLT	6	33525680	33557903	BAK1	C	T	0.655	0.048	NA	6.23e-26
Step 1	BAK1	ILMN_1805990.ENSG00000030110	6	33572547	33580293	PLT	0.242	MESA	HL	rs399604	22139419	European	PLT	6	32975014	33007237	HLA-DOA	C	T	NA	2.346	0.365	1.3e-10
Step 1	BAK1	ILMN_1805990.ENSG00000030110	6	33572547	33580293	PLT	0.242	MESA	HL	rs449242	21153663	AfricanAmerican	PLT	6	33496714	33528937	BAK1	T	G	0.33	-0.126	0.023	6.2e-08
Step 1	BAK1	ILMN_1805990.ENSG00000030110	6	33572547	33580293	PLT	0.242	MESA	HL	rs513349	23103231	AfricanAmerican	PLT	6	33541719	33573942	BAK1	A	G	0.367	-4.907	0.778	2.9e-10
Step 1	BAK1	ILMN_1805990.ENSG00000030110	6	33572547	33580293	PLT	0.242	MESA	HL	rs5745568	20139978	Japanese	PLT	6	33548394	33580617	BAK1	T	G	0.23	0.09	0.014	6.66e-11
Step 1	BAK1	ILMN_1805990.ENSG00000030110	6	33572547	33580293	PLT	0.242	MESA	HL	rs5745582	21153663	European	PLT	6	33546498	33578721	BAK1	T	C	0.21	0.076	0.015	7.6e-07
Step 1	BAK1	ILMN_1805990.ENSG00000030110	6	33572547	33580293	PLT	0.242	MESA	HL	rs62405954	26805783	Hispanic/Latino	PLT	6	33524820	33557043	ZBTB9-BAK1	T	C	0.86	-0.239	0.037	1.1e-10
Step 1	BAK1	ILMN_1805990.ENSG00000030110	6	33572547	33580293	PLT	0.242	MESA	HL	rs75080135	27863252	European	PLT	6	33552707	33584930	GGNBP1	C	A	0.177	0.071	0.004	5.82e-101
Step 1	BAK1	ILMN_1805990.ENSG00000030110	6	33572547	33580293	PLT	0.242	MESA	HL	rs9277053	26064965	Korean	PLT	6	33006222	33038445	HLA-DOA-HLA-DPA1	A	G	0.34	5.18	1.049	7.95e-07
Step 1	BAK1	ILMN_1805990.ENSG00000030110	6	33572547	33580293	PLT	0.242	MESA	HL	rs9296095	25705162	Korean	PLT	6	33542523	33574746	BAK1	G	A	0.23	4.8	1.17	4.24e-05
Step 2	SLC22A4	ILMN_2050911.ENSG00000197208	5	132294394	132344190	WBC	0.153	MESA	HL	rs2631367	32888494	European	WBC#	5	131705458	132369766	SLC22A5	G	C	0.522	0.034	0.002	3.41e-58
Step 2	SLC22A4	ILMN_2050911.ENSG00000197208	5	132294394	132344190	WBC	0.153	MESA	HL	rs17622517	32888494	European	WBC#	5	131803537	132467845	C5orf56	C	T	0.082	-0.041	0.004	1.09e-26
Step 1	BAZ2B	ENSG00000123636	2	159318979	159616692	PLT	0.000173	DGN	AA	rs12052715	27863252	European	PLT	2	160677375	159820864	LY75-CD302_LY75	G	C	0.7247	-0.031029	0.0035878	2.72e-17
Step 1	BAZ2B	ENSG00000123636	2	159318979	159616692	PLT	0.000173	DGN	AA	rs12692566	27346686	CombinedAncestry	PLT	2	160676427	159819916	LY75-CD302	A	C	0.83	-0.026	NA	2.27e-06
Step 1	BAZ2B	ENSG00000123636	2	159318979	159616692	PLT	0.000173	DGN	AA	rs147820690	28787443	European	PLT	2	160735174	159878663	LY75-CD302	T	C	0.0026	0.1654	0.0287	8.19e-09
Step 1	BAZ2B	ENSG00000123636	2	159318979	159616692	PLT	0.000173	DGN	AA	rs148440689	27863252	European	PLT	2	160604541	159748030	2021-03-07	A	G	0.024	0.07859	0.01047	1.7e-16
Step 1	BAZ2B	ENSG00000123636	2	159318979	159616692	PLT	0.000173	DGN	AA	rs78446341	27346686	CombinedAncestry	PLT	2	160690656	159834145	LY75-CD302	A	G	0.018	0.094	NA	3.06e-10
Step 1	BAZ2B	ENSG00000123636	2	159318979	159616692	PLT	0.000173	DGN	AA	rs78685880	29403010	Japanese	PLT	2	160706544	159850033	LY75;LY75-CD302	G	A	0.026	0.118	0.015	6.7e-16
Step 2	CD36	ENSG00000135218	7	80369575	80679277	PLT	0.167	DGN	AA	rs11764390	32888494	European	PLT	7	80216205	80586889	CD36	A	G	0.439474	0.0238797	0.00214948	1.12759e-28
Step 2	CD36	ENSG00000135218	7	80369575	80679277	PLT	0.167	DGN	AA	rs3211851	32888494	European	PLT	7	80654141	80654141	CD36	C	T	0.074595	0.0383442	0.00403873	2.22072e-21
Step 1	MEG3	ENSG00000214548	14	100779410	100861031	PLT	0.000335	DGN	AA	rs12883126	27346686	CombinedAncestry	PLT	14	101134008	100667671	LINC00523	T	C	0.7063	0.024181	NA	1.24e-07
Step 1	MEG3	ENSG00000214548	14	100779410	100861031	PLT	0.000335	DGN	AA	rs1555405	27863252	European	PLT	14	101176769	100710432	NA	A	G	0.2489	-0.051568	0.0036346	8.97e-33
Step 1	MEG3	ENSG00000214548	14	100779410	100861031	PLT	0.000335	DGN	AA	rs7149242	22139419	European	PLT	14	101159416	100693079	C14orf70;DLK1	G	T	NA	2.142	0.385	2.68e-08
Step 1	MEG3	ENSG00000214548	14	100779410	100861031	PLT	0.000335	DGN	AA	rs9635298	29403010	Japanese	PLT	14	101172542	100706205	LINC00523;DLK1	T	C	0.305	-0.029	0.005	1.64e-10
Step 1	TPM4	ENSG00000167460	19	16067021	16103002	PLT	0.0669	DGN	AA	rs143558304	27863252	European	PLT	19	16213697	16102887	TPM4	TA	T	0.019	-0.23044	0.012167	3.88e-61
Step 1	TPM4	ENSG00000167460	19	16067021	16103002	PLT	0.0669	DGN	AA	rs17708984	27863252	European	PLT	19	16194504	16083694	TPM4	A	G	0.2879	0.024422	0.003493	6.04e-16
Step 1	TPM4	ENSG00000167460	19	16067021	16103002	PLT	0.0669	DGN	AA	rs73517714	26805783	Hispanic/Latino	PLT	19	16203304	16092494	TPM4	C	A	0.97	0.508	0.069	1.8e-13
Step 1	TPM4	ENSG00000167460	19	16067021	16103002	PLT	0.0669	DGN	AA	rs8109288	21153663	AfricanAmerican	PLT	19	16185559	16074749	TPM4	A	G	0.09	-0.159	0.03	3e-07

## Sheet: Supplementary Table 6
Supplementary Table 6 The 10 multi-gene locus results from our TWAS analyses, with fine-mapping credible set posterior probabilities of inclusion. Locus index refers to the locus column in Supplementary Table 4.
Locus index	Genename	ENSGID	Chr	Start_hg38	End_hg38	Phenotype	Marginal p.value	TWAS reference panel	Discovery population	Locus name	PIP
7	HBQ1	ENSG00000086506	16	180453	181181	HGB	4.88e-14	DGN	AA	HBQ1	1
7	HBZ	ENSG00000130656	16	152687	154503	HGB	8.41e-07	DGN	AA	HBQ1	0.999
7	HAGHL	ENSG00000103253	16	726936	735525	HGB	0.143	DGN	AA	HBQ1	0.95
7	RAB11FIP3	ENSG00000090565	16	425619	523011	HGB	4.48e-05	DGN	AA	HBQ1	0.89
7	NME4	ENSG00000103202	16	396725	410367	HGB	0.000116	DGN	AA	HBQ1	0.388
7	WDR24	ENSG00000127580	16	684622	690444	HGB	4e-05	DGN	AA	HBQ1	0.178
7	AXIN1	ENSG00000103126	16	287440	352723	HGB	0.000432	DGN	AA	HBQ1	0.129
7	MSLN	ENSG00000102854	16	760734	768865	HGB	0.0257	DGN	AA	HBQ1	0.079
7	MPG	ENSG00000103152	16	77007	85851	HGB	0.000833	DGN	AA	HBQ1	0.0736
7	TMEM8A	ENSG00000129925	16	370788	387113	HGB	0.00265	DGN	AA	HBQ1	0.0529
7	SNRNP25	ENSG00000161981	16	53828	57669	HGB	0.0389	DGN	AA	HBQ1	0.0496
7	LUC7L	ENSG00000007392	16	188969	229463	HGB	0.00177	DGN	AA	HBQ1	0.0215
7	HBA1	ENSG00000206172	16	176680	177522	HGB	0.974	DGN	AA	HBQ1	0.0168
7	FBXL16	ENSG00000127585	16	692498	705808	HGB	0.0211	DGN	AA	HBQ1	0.0168
7	WDR90	ENSG00000161996	16	649311	667833	HGB	0.545	DGN	AA	HBQ1	0.0149
7	RGS11	ENSG00000076344	16	268301	275980	HGB	0.0164	DGN	AA	HBQ1	0.00634
7	LMF1	ENSG00000103227	16	853634	981318	HGB	0.241	DGN	AA	HBQ1	0.00322
7	POLR3K	ENSG00000161980	16	46407	53608	HGB	0.0527	DGN	AA	HBQ1	0.00239
7	CIAO3	ENSG00000103245	16	729760	741329	HGB	0.048	DGN	AA	HBQ1	0.00236
7	RHBDL1	ENSG00000103269	16	675671	678268	HGB	0.045	DGN	AA	HBQ1	0.00191
10	MFN2	ENSG00000116688	1	11980181	12013514	PLT	1.363e-05	DGN	AA	MFN2	0.598
10	PLOD1	ENSG00000083444	1	11934205	11975538	PLT	2.746e-05	DGN	AA	MFN2	0.31
10	KIAA2013	ENSG00000116685	1	11919591	11926428	PLT	0.0001027	DGN	AA	MFN2	0.09
14	C6orf227	ENSG00000197251	6	33586106	33593338	PLT	2.422e-12	DGN	AA	BAK1	1
14	DAXX	ENSG00000204209	6	33318558	33323016	PLT	0.1307	DGN	AA	BAK1	1
14	BAK1	ENSG00000030110	6	33572547	33580293	PLT	3.757e-21	DGN	AA	BAK1	1
14	HLA-DPB2	ENSG00000224557	6	33112451	33129084	PLT	0.1063	DGN	AA	BAK1	0.995
14	HLA-DPA1	ENSG00000231389	6	33064569	33080775	PLT	0.02714	DGN	AA	BAK1	0.995
26	CREB5	ENSG00000146592	7	28299321	28825894	WBC	5.35e-10	DGN	AA	CREB5	1
26	JAZF1	ENSG00000153814	7	27830573	28180743	WBC	4.25e-05	DGN	AA	CREB5	0.983
26	TAX1BP1	ENSG00000106052	7	27739331	27844564	WBC	0.611	DGN	AA	CREB5	0.0257
26	CHN2	ENSG00000106069	7	29146569	29514328	WBC	0.817	DGN	AA	CREB5	0.0242
26	HIBADH	ENSG00000106049	7	27525442	27662883	WBC	0.835	DGN	AA	CREB5	0.0232
32	MED24	ENSG00000008838	17	40019097	40061215	WBC	7.86e-08	DGN	AA	MED24	1
32	PSMD3	ENSG00000108344	17	39980797	39997960	WBC	5.12e-07	DGN	AA	MED24	0.999
32	RARA	ENSG00000131759	17	40309180	40357643	WBC	0.0985	DGN	AA	MED24	0.215
32	ORMDL3	ENSG00000172057	17	39921041	39927601	WBC	0.00705	DGN	AA	MED24	0.117
32	TMEM99	ENSG00000167920	17	40819106	40836270	WBC	0.0455	DGN	AA	MED24	0.0231
32	STARD3	ENSG00000131748	17	39637090	39664201	WBC	0.0936	DGN	AA	MED24	0.0178
32	CDK12	ENSG00000167258	17	39461486	39564907	WBC	0.0787	DGN	AA	MED24	0.0178
32	IGFBP4	ENSG00000141753	17	40443450	40457725	WBC	0.0718	DGN	AA	MED24	0.0175
32	NR1D1	ENSG00000126368	17	40092793	40100589	WBC	0.0807	DGN	AA	MED24	0.0144
32	PPP1R1B	ENSG00000131771	17	39626740	39636626	WBC	0.132	DGN	AA	MED24	0.0113
32	GSDMB	ENSG00000073605	17	39904595	39919854	WBC	0.0794	DGN	AA	MED24	0.0104
32	RPL19	ENSG00000108298	17	39200283	39204840	WBC	0.365	DGN	AA	MED24	0.00953
32	THRA	ENSG00000126351	17	40058290	40093867	WBC	0.135	DGN	AA	MED24	0.0087
32	ERBB2	ENSG00000141736	17	39687914	39730426	WBC	0.219	DGN	AA	MED24	0.00753
32	GSDMA	ENSG00000167914	17	39953263	39977768	WBC	0.137	DGN	AA	MED24	0.00732
32	TCAP	ENSG00000173991	17	39665349	39666554	WBC	0.249	DGN	AA	MED24	0.00652
32	CDC6	ENSG00000094804	17	40287879	40304657	WBC	0.246	DGN	AA	MED24	0.00607
32	PLXDC1	ENSG00000161381	17	39063313	39154394	WBC	0.322	DGN	AA	MED24	0.00595
32	MSL1	ENSG00000188895	17	40121971	40136917	WBC	0.304	DGN	AA	MED24	0.00588
32	CACNB1	ENSG00000067191	17	39173453	39197703	WBC	0.364	DGN	AA	MED24	0.00569
32	CCR7	ENSG00000126353	17	40553769	40565472	WBC	0.369	DGN	AA	MED24	0.00566
32	PGAP3	ENSG00000161395	17	39671122	39696797	WBC	0.413	DGN	AA	MED24	0.00509
32	KRT23	ENSG00000108244	17	40922700	40937646	WBC	0.445	DGN	AA	MED24	0.00477
32	TNS4	ENSG00000131746	17	40475828	40501623	WBC	0.656	DGN	AA	MED24	0.00405
32	GJD3	ENSG00000183153	17	40360652	40364737	WBC	0.622	DGN	AA	MED24	0.0038
32	WIPF2	ENSG00000171475	17	40219304	40284136	WBC	0.691	DGN	AA	MED24	0.00374
32	PNMT	ENSG00000141744	17	39667981	39670475	WBC	0.645	DGN	AA	MED24	0.0037
32	CASC3	ENSG00000108349	17	40140318	40172171	WBC	0.705	DGN	AA	MED24	0.00368
32	FBXL20	ENSG00000108306	17	39252663	39402523	WBC	0.569	DGN	AA	MED24	0.00367
32	RAPGEFL1	ENSG00000108352	17	40177010	40195656	WBC	0.836	DGN	AA	MED24	0.0036
32	KRT10	ENSG00000186395	17	40818117	40822614	WBC	0.671	DGN	AA	MED24	0.00357
32	MED1	ENSG00000125686	17	39404285	39451272	WBC	0.817	DGN	AA	MED24	0.00345
36	NPRL3	ILMN_2369580.ENSG00000103148	16	84271	138860	HGB	1.34e-11	MESA	AA	NPRL3	1
36	CIAO3	ILMN_1813833.ENSG00000103245	16	729753	741329	HGB	3.46e-08	MESA	AA	NPRL3	1
36	FAM234A	ILMN_1810055.ENSG00000167930	16	234521	272183	HGB	1.33e-06	MESA	AA	NPRL3	0.991
36	ANTKMT	ILMN_1773780.ENSG00000103254	16	720581	722601	HGB	5.79e-05	MESA	AA	NPRL3	0.778
36	RAB11FIP3	ILMN_1708328.ENSG00000090565	16	425619	523011	HGB	2.45e-05	MESA	AA	NPRL3	0.747
36	AXIN1	ILMN_1766185.ENSG00000103126	16	287440	352723	HGB	0.0004	MESA	AA	NPRL3	0.365
36	NME4	ILMN_1800634.ENSG00000103202	16	396725	410367	HGB	0.00263	MESA	AA	NPRL3	0.0195
21	DARS	ILMN_1813836.ENSG00000115866	2	135906677	135986100	WBC	1.37e-09	MESA	AA	DARS	1
21	CXCR4	ILMN_1801584.ENSG00000121966	2	136114349	136118149	WBC	0.95	MESA	AA	DARS	1
21	RAB3GAP1	ILMN_1739876.ENSG00000115839	2	135052265	135176394	WBC	2.38e-05	MESA	AA	DARS	0.996
21	CXCR4	ILMN_2320888.ENSG00000121966	2	136114349	136118149	WBC	0.377	MESA	AA	DARS	0.117
42	MTX1	ENSG00000173171	1	155208695	155213824	HCT	0.000967	DGN	HL	THBS3	1
42	GBAP1	ENSG00000169231	1	155213821	155227422	HCT	2.23e-05	DGN	HL	THBS3	1
42	THBS3	ENSG00000169231	1	155195588	155209051	HCT	9.8e-08	DGN	HL	THBS3	1
42	TRIM46	ENSG00000163462	1	155173787	155184971	HCT	2.74e-05	DGN	HL	THBS3	0.997
42	EFNA3	ENSG00000143590	1	155078872	155087538	HCT	4.49e-05	DGN	HL	THBS3	0.945
42	KRTCAP2	ENSG00000163463	1	155169408	155173475	HCT	0.000253	DGN	HL	THBS3	0.0291
42	THBS3	ILMN_1804663.ENSG00000169231	1	155195588	155209051	HCT	5.4e-08	MESA	HL	THBS3	1
42	ADAM15	ILMN_1751500.ENSG00000143537	1	155050566	155062775	HCT	8.74e-06	MESA	HL	THBS3	0.988
42	YY1AP1	ILMN_1752303.ENSG00000163374	1	155659443	155689000	HCT	0.00562	MESA	HL	THBS3	0.933
42	SSR2	ILMN_1783226.ENSG00000163479	1	156009048	156020951	HCT	0.0849	MESA	HL	THBS3	0.929
42	SYT11	ILMN_1717934.ENSG00000132718	1	155859567	155885199	HCT	0.00414	MESA	HL	THBS3	0.113
42	ADAM15	ILMN_2384544.ENSG00000143537	1	155050566	155062775	HCT	0.0149	MESA	HL	THBS3	0.0818
42	ADAM15	ILMN_1756920.ENSG00000143537	1	155050566	155062775	HCT	0.061	MESA	HL	THBS3	0.0176
42	IL6R	ILMN_1696394_ENSG00000160712	1	154405193	154469450	HCT	0.157	MESA	HL	THBS3	0.013
42	DAP3	ILMN_1781680_ENSG00000132676	1	155687960	155739010	HCT	0.0139	MESA	HL	THBS3	0.0109
42	LMNA	ILMN_1737394_ENSG00000160789	1	156082573	156140081	HCT	0.32	MESA	HL	THBS3	0.0109
42	UBQLN4	ILMN_1789349_ENSG00000160803	1	156035299	156053798	HCT	0.117	MESA	HL	THBS3	0.00839
42	SLC25A44	ILMN_1810514_ENSG00000160785	1	156193932	156212796	HCT	0.498	MESA	HL	THBS3	0.00678
42	UBAP2L	ILMN_1814789_ENSG00000143569	1	154220179	154271510	HCT	0.712	MESA	HL	THBS3	0.00676
42	EFNA4	ILMN_1665696_ENSG00000243364	1	155063737	155069553	HCT	0.298	MESA	HL	THBS3	0.00643
42	SLC50A1	ILMN_2218648_ENSG00000169241	1	155135344	155138857	HCT	0.211	MESA	HL	THBS3	0.00608
42	EFNA4	ILMN_1755710_ENSG00000243364	1	155063737	155069553	HCT	0.38	MESA	HL	THBS3	0.00587
42	RIT1	ILMN_1656335_ENSG00000143622	1	155897808	155911404	HCT	0.294	MESA	HL	THBS3	0.00567
42	HCN3	ILMN_1787256_ENSG00000143630	1	155277463	155289848	HCT	0.379	MESA	HL	THBS3	0.00515
42	LMNA	ILMN_1696749_ENSG00000160789	1	156082573	156140081	HCT	0.366	MESA	HL	THBS3	0.00487
42	ARHGEF2	ILMN_1703477_ENSG00000116584	1	155946851	156007070	HCT	0.903	MESA	HL	THBS3	0.00469
42	SSR2	ILMN_1783226_ENSG00000163479	1	156009048	156020951	HGB	0.0849	MESA	HL	THBS3	0.997
42	YY1AP1	ILMN_1752303.ENSG00000163374	1	155659443	155689000	HGB	0.0035	MESA	HL	THBS3	0.996
42	THBS3	ILMN_1804663.ENSG00000169231	1	155195588	155209051	HGB	2.88e-05	MESA	HL	THBS3	0.927
42	ADAM15	ILMN_1751500.ENSG00000143537	1	155050566	155062775	HGB	3.95e-05	MESA	HL	THBS3	0.82
42	ADAM15	ILMN_2384544.ENSG00000143537	1	155050566	155062775	HGB	0.00308	MESA	HL	THBS3	0.0896
42	SYT11	ILMN_1717934.ENSG00000132718	1	155859567	155885199	HGB	0.0215	MESA	HL	THBS3	0.0383
42	ADAM15	ILMN_1756920_ENSG00000143537	1	155050566	155062775	HGB	0.0183	MESA	HL	THBS3	0.0175
42	RIT1	ILMN_1656335.ENSG00000143622	1	155897808	155911404	HGB	0.0717	MESA	HL	THBS3	0.0171
42	UBQLN4	ILMN_1789349_ENSG00000160803	1	156035299	156053798	HGB	0.0582	MESA	HL	THBS3	0.0147
42	C1orf43	ILMN_1660602_ENSG00000143612	1	154206696	154220637	HGB	0.68	MESA	HL	THBS3	0.0132
42	LMNA	ILMN_1737394_ENSG00000160789	1	156082573	156140081	HGB	0.421	MESA	HL	THBS3	0.0111
42	HCN3	ILMN_1787256_ENSG00000143630	1	155277463	155289848	HGB	0.19	MESA	HL	THBS3	0.00933
42	SLC50A1	ILMN_2218648_ENSG00000169241	1	155135344	155138857	HGB	0.149	MESA	HL	THBS3	0.00701
42	ARHGEF2	ILMN_1703477_ENSG00000116584	1	155946851	156007070	HGB	0.964	MESA	HL	THBS3	0.00684
42	UBAP2L	ILMN_1814789_ENSG00000143569	1	154220179	154271510	HGB	0.55	MESA	HL	THBS3	0.00653
42	IL6R	ILMN_1696394_ENSG00000160712	1	154405193	154469450	HGB	0.568	MESA	HL	THBS3	0.00619
42	LMNA	ILMN_1696749_ENSG00000160789	1	156082573	156140081	HGB	0.499	MESA	HL	THBS3	0.00547
42	DAP3	ILMN_1781680_ENSG00000132676	1	155687960	155739010	HGB	0.0193	MESA	HL	THBS3	0.00518
42	EFNA4	ILMN_1665696_ENSG00000243364	1	155063737	155069553	HGB	0.398	MESA	HL	THBS3	0.00506
42	HAX1	ILMN_1750658_ENSG00000143575	1	154272589	154275875	HGB	0.264	MESA	HL	THBS3	0.00476
42	LAMTOR2	ILMN_1756352_ENSG00000116586	1	156054782	156058506	HGB	0.336	MESA	HL	THBS3	0.00449
42	ASH1L	ILMN_1782032_ENSG00000116539	1	155335268	155563162	HGB	0.524	MESA	HL	THBS3	0.00434
42	SLC25A44	ILMN_1810514_ENSG00000160785	1	156193932	156212796	HGB	0.709	MESA	HL	THBS3	0.00401
42	EFNA4	ILMN_1755710_ENSG00000243364	1	155063737	155069553	HGB	0.88	MESA	HL	THBS3	0.00399
42	UBE2Q1	ILMN_1776325_ENSG00000160714	1	154548577	154559028	HGB	0.761	MESA	HL	THBS3	0.00385
42	ADAR	ILMN_2320964_ENSG00000160710	1	154581695	154628013	HGB	0.839	MESA	HL	THBS3	0.00364
42	SEMA4A	ILMN_1702787_ENSG00000196189	1	156147366	156177752	HGB	0.916	MESA	HL	THBS3	0.00362

## Sheet: Supplementary Table 7
Supplementary Table 7: Bonferroni corrected p-value thresholds for TWAS analysis in each ancestry group and with each reference panel, based on the number of tested genes.
Phenotype	TWAS reference panel	Discovery population	Number of tested genes	Bonferroni threshold value
HCT/HGB/PLT/WBC	DGN	AA	9781	5e-06
HCT/HGB/PLT/WBC	DGN	HL	9843	5e-06
HCT/HGB/PLT/WBC	MESA	AA	6942	7.2e-06
HCT/HGB/PLT/WBC	MESA	HL	6495	7.7e-06
